# Supplementary material for: The ancient CYP716 family is a major contributor to the diversification of eudicot triterpenoid biosynthesis
Source: PubMed Central journal article supplement (PMC5303825; doi:10.1038/ncomms14153), 2017-02-06
Supplement: ncomms14153-s1.pdf [file ncomms14153-s1.pdf]

**Supplementary Information**

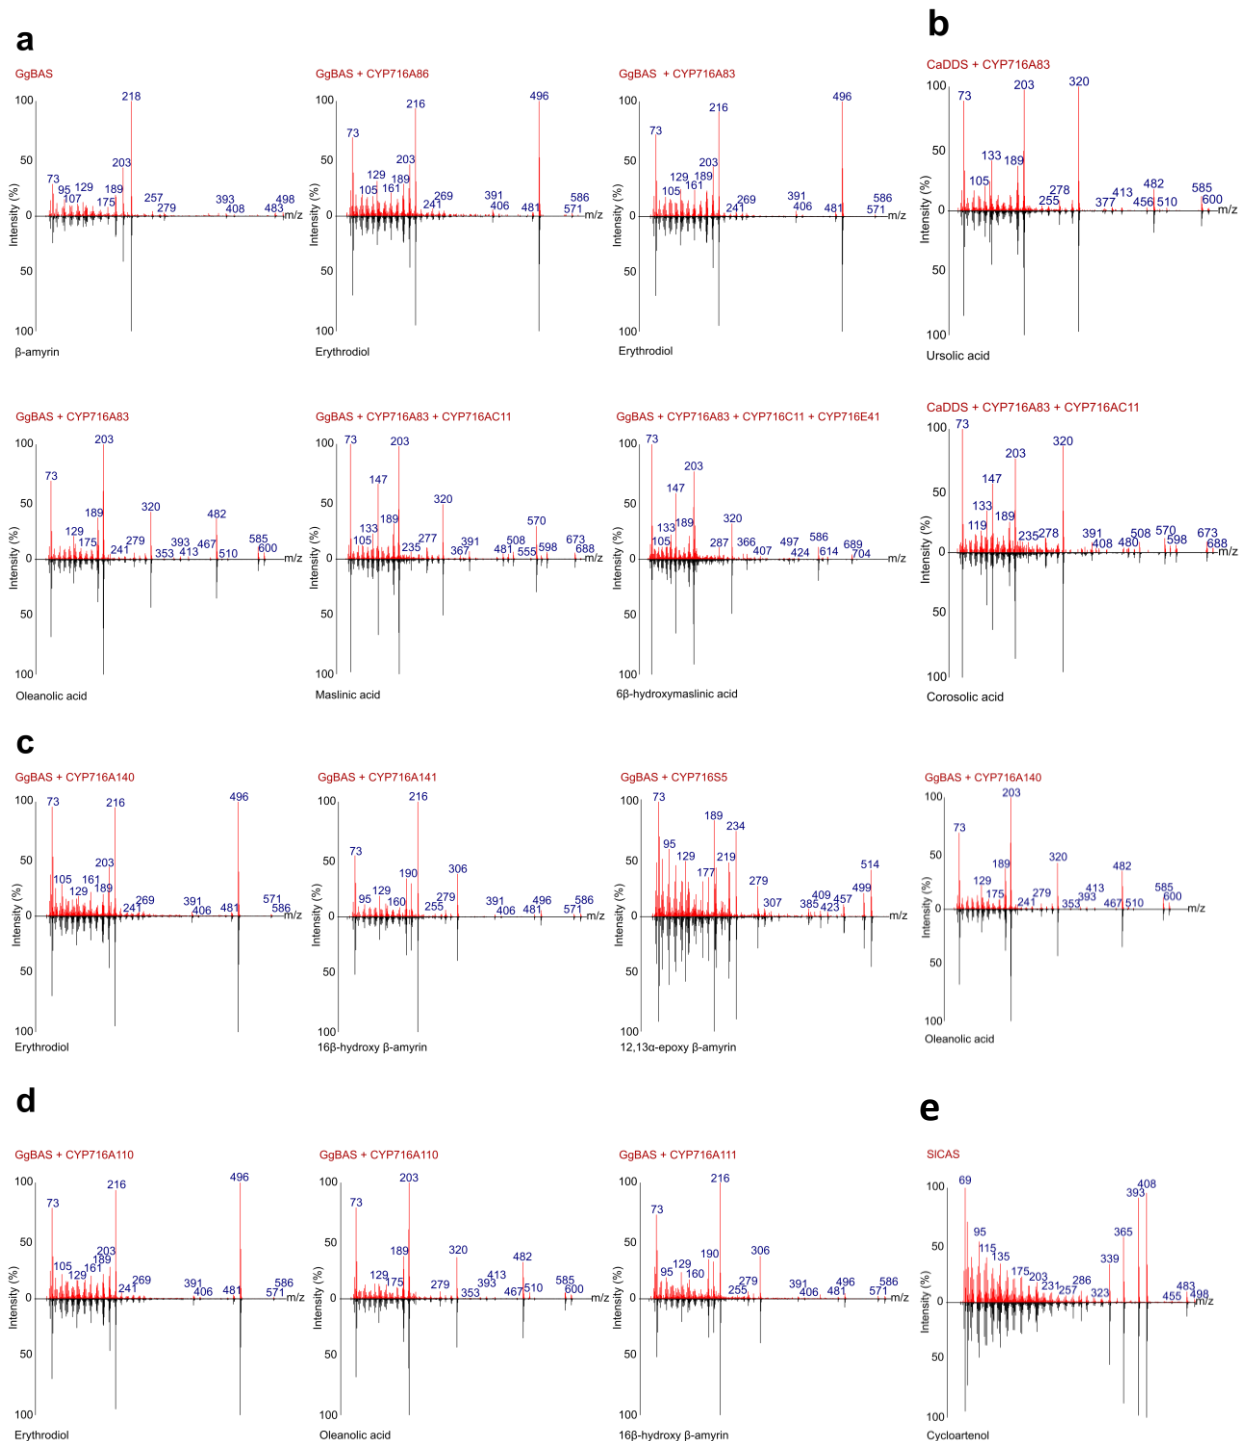

**Supplementary Fig. 1.** Mass spectra of silylated standards (black) and CYP716 triterpenoid products produced in yeast strains (red). **(a)** With GgBAS and *C. asiatica* CYP716s. **(b)** With CaDDS and *C. asiatica* CYP716s. **(c)** With GgBAS and *P. grandiflorus* CYP716s. **(d)** With GgBAS and *A. coerulea* CYP716s. **(e)** With SICAS and *A. coerulea* CYP716s.

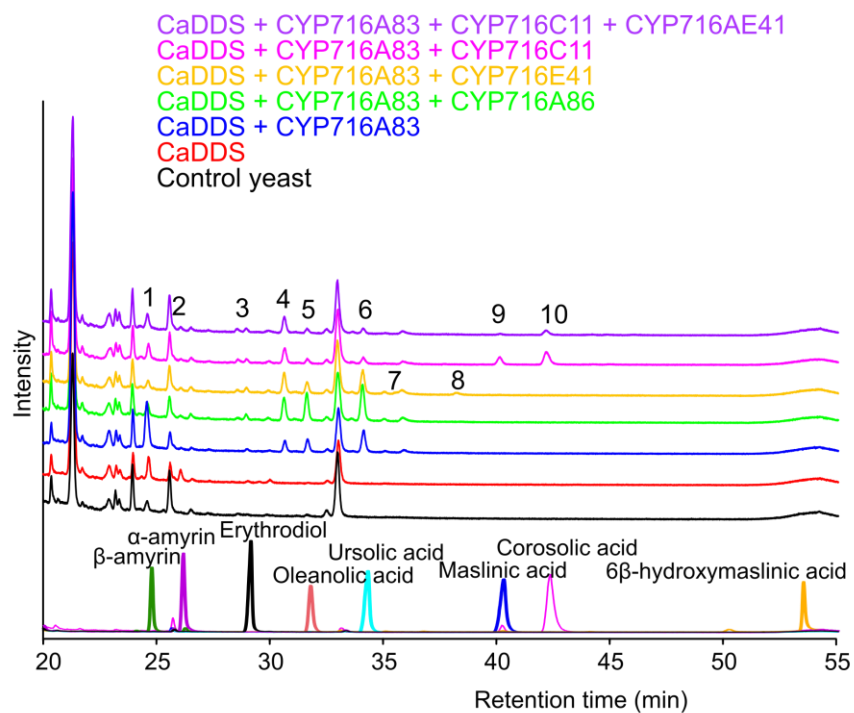

**Supplementary Fig. 2.** Overlay of GC-MS total ion current chromatograms showing accumulation of standard compounds and triterpenoids produced in yeast strains expressing other *C. asiatica* CYP716s in combination with CYP716A83 and CaDDS. Annotated triterpenoid peaks are indicated with numbers: (1)  $\beta$ -amyrin, (2)  $\alpha$ -amyrin, (3) erythrodiol, (4) putative uvaol, (5) oleanolic acid, (6) ursolic acid, (7) putative 6 $\beta$ -hydroxy oleanolic acid, (8) putative 6 $\beta$ -hydroxy ursolic acid, (9) maslinic acid, and (10) corosolic acid.

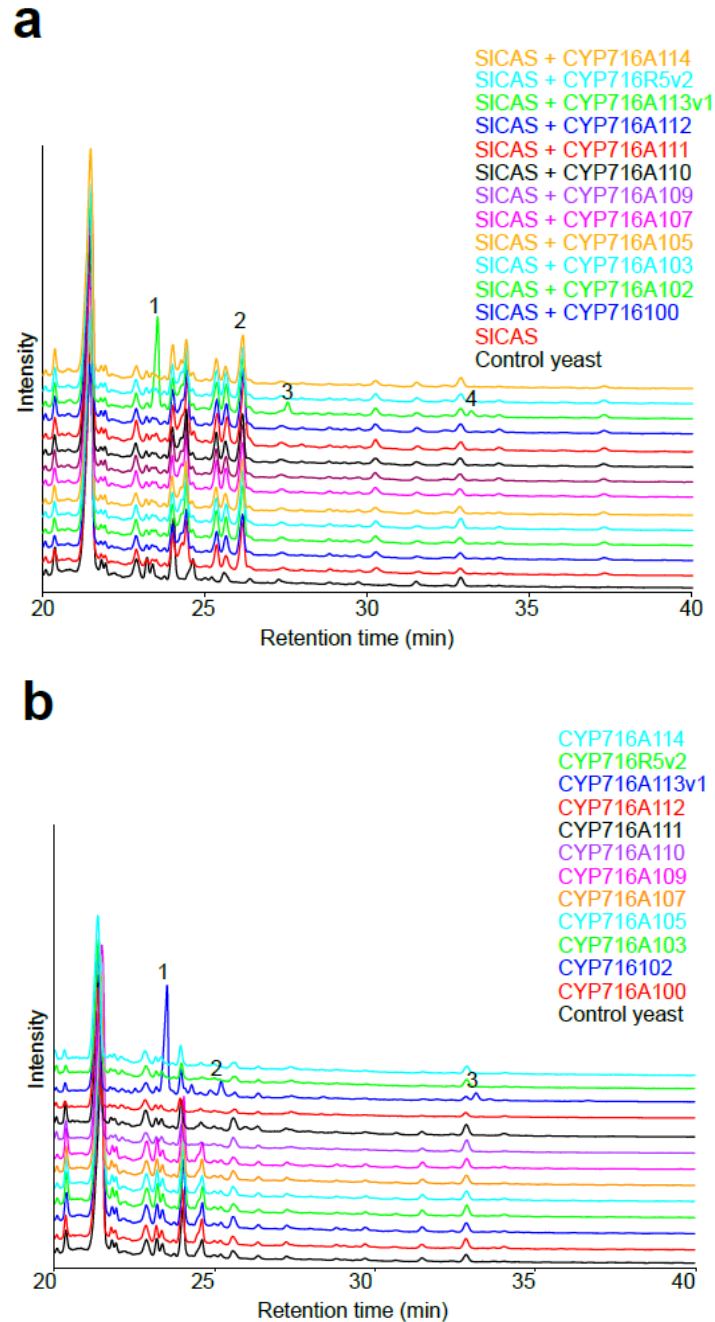

**Supplementary Fig. 3.** Overlay of GC-MS total ion current chromatograms showing accumulation of standard compounds and triterpenoids produced in yeast strains expressing *A. coerulea* CYP716s. **(a)** In combination with SICAS. Annotated triterpenoid peaks are indicated with numbers: (1) and (4) non-specific CYP716A113v1 products with yeast sterol precursors, (2) product of cycloartenol metabolized by yeast enzymes, (3) putative hydroxycycloartenol. **(b)** In a control yeast expressing no plant OSC. Annotated triterpenoid peaks are indicated with numbers: (1), (2) and (3) non-specific CYP716A113v1 products with yeast sterol precursors.

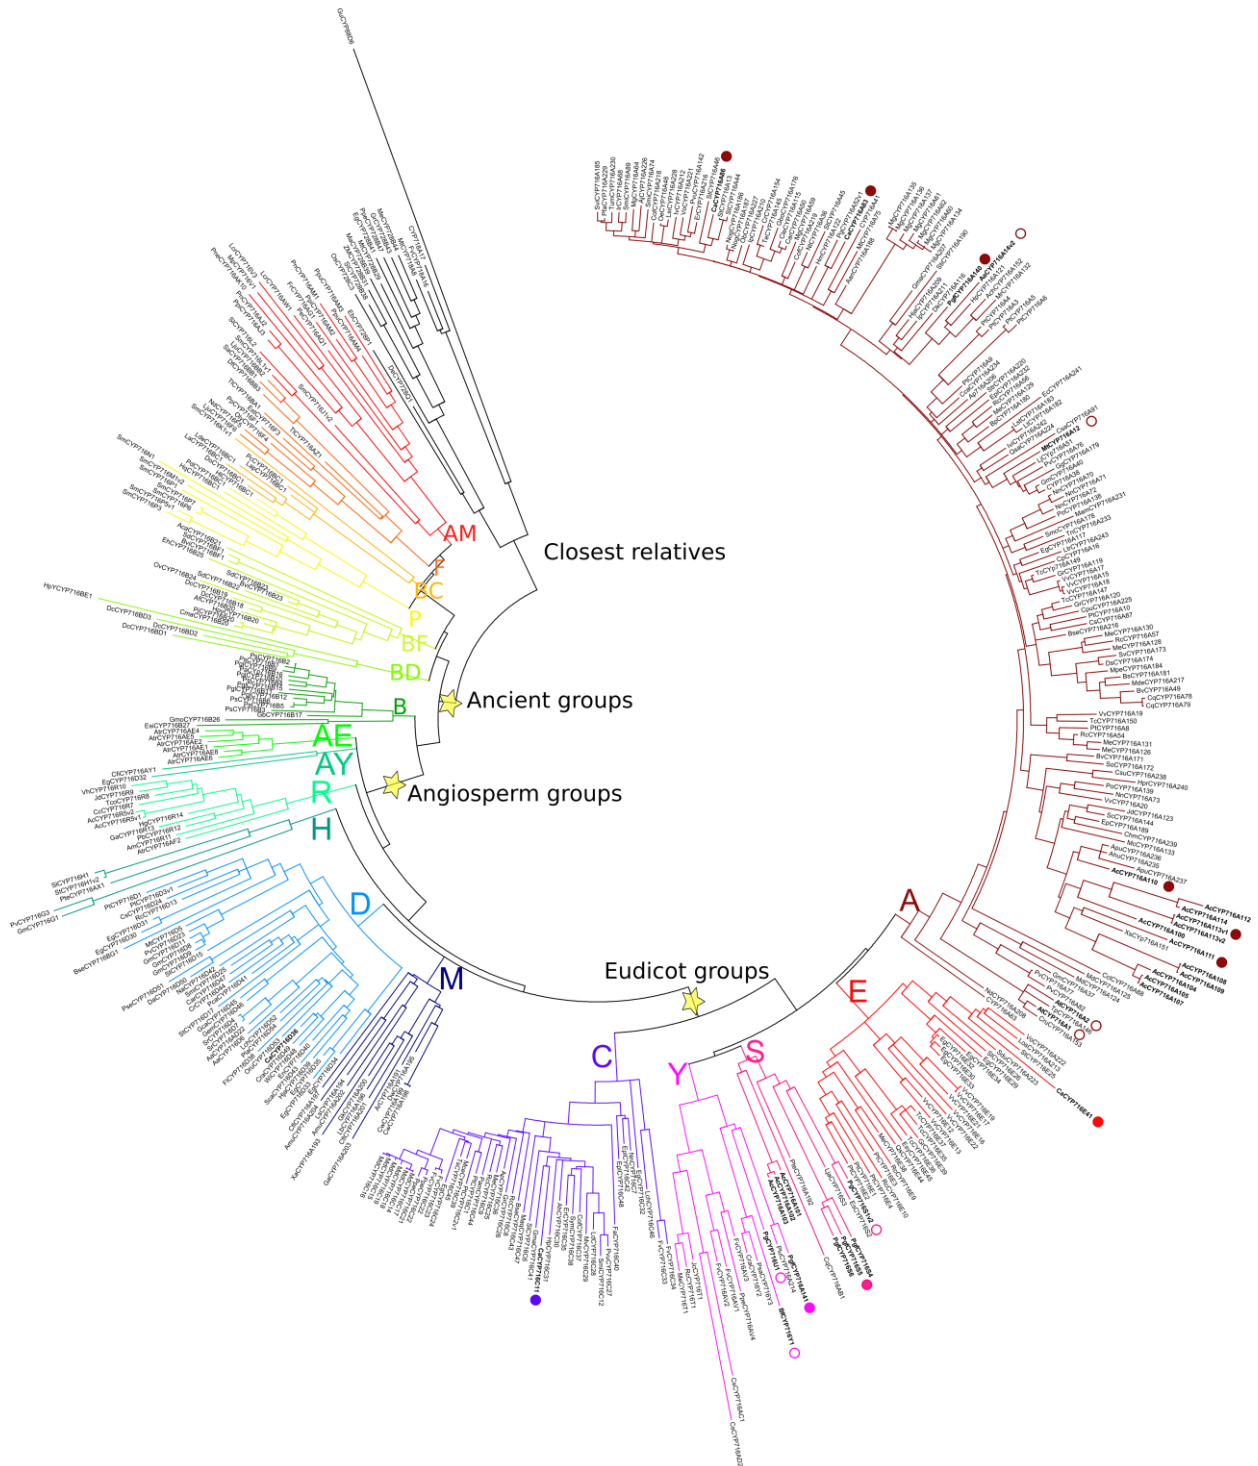

**Supplementary Fig. 4.** Maximum likelihood phylogenetic tree of *CYP716* sequences from plant species spanning the plant kingdom. *CYP716*s that were characterized previously and in this study are marked with empty and filled dots, respectively. The yellow stars mark the points of divergence for the three classes of *CYP716*s: ‘Dicot’, ‘Angiosperm’, and ‘Ancient’ *CYP716*s.

**Supplementary Table 1.** Previously characterized triterpenoid-metabolizing P450s with references.

| Gene name   | P450 Clan | Species                      | Substrate                                   | Reaction                                                       | Reference       |
|-------------|-----------|------------------------------|---------------------------------------------|----------------------------------------------------------------|-----------------|
| CYP51H10    | 51        | <i>Avena strigosa</i>        | $\beta$ -amyrin                             | C-16 $\beta$ hydroxylation + $\beta$ -epoxidation of C-12–C-13 | <sup>1</sup>    |
| CYP705A1    | 71        | <i>Arabidopsis thaliana</i>  | Arabidiol                                   | C-15–C-16 cleavage                                             | <sup>2</sup>    |
| CYP705A5    | 71        | <i>Arabidopsis thaliana</i>  | 7 $\beta$ -Hydroxythalianol                 | C-15–C-16 desaturation                                         | <sup>3</sup>    |
| CYP708A2    | 85        | <i>Arabidopsis thaliana</i>  | Thalianol                                   | C-7 hydroxylation                                              | <sup>2,3</sup>  |
| CYP716A1    | 85        | <i>Arabidopsis thaliana</i>  | Tirucalla-7,24-dien-3 $\beta$ -ol           | unknown hydroxylation                                          | <sup>4,5</sup>  |
| CYP716A2    | 85        | <i>Arabidopsis thaliana</i>  | $\alpha$ -amyrin                            | C-22 $\alpha$ hydroxylation                                    | <sup>5</sup>    |
| CYP716A12   | 85        | <i>Medicago truncatula</i>   | $\beta$ -amyrin, $\alpha$ -amyrin, lupeol   | C-28 oxidation (three steps)                                   | <sup>6,7</sup>  |
| CYP716A14v2 | 85        | <i>Artemisia annua</i>       | $\beta$ -amyrin, $\alpha$ -amyrin, lupeol   | C-3 oxidation                                                  | <sup>8</sup>    |
| CYP716A15   | 85        | <i>Vitis vinifera</i>        | $\beta$ -amyrin, $\alpha$ -amyrin, lupeol   | C-28 oxidation (three steps)                                   | <sup>7</sup>    |
| CYP716A17   | 85        | <i>Vitis vinifera</i>        | $\beta$ -amyrin                             | C-28 oxidation (three steps)                                   | <sup>7</sup>    |
| CYP716A47   | 85        | <i>Panax ginseng</i>         | dammarenediol-II                            | C-12 hydroxylation                                             | <sup>9</sup>    |
| CYP716A52v2 | 85        | <i>Panax ginseng</i>         | $\beta$ -amyrin                             | C-28 oxidation (three steps)                                   | <sup>10</sup>   |
| CYP716A53v2 | 85        | <i>Panax ginseng</i>         | protopanaxadiol                             | C-6 hydroxylation                                              | <sup>11</sup>   |
| CYP716A75   | 85        | <i>Maesa lanceolata</i>      | $\beta$ -amyrin                             | C-28 oxidation (three steps)                                   | <sup>12</sup>   |
| CYP716A80   | 85        | <i>Barbarea vulgaris</i>     | $\beta$ -amyrin                             | C-28 oxidation (three steps)<br>+ unknown                      | <sup>13</sup>   |
| CYP716A81   | 85        | <i>Barbarea vulgaris</i>     | $\beta$ -amyrin                             | C-28 oxidation (three steps)<br>+ unknown                      | <sup>13</sup>   |
| CYP716AL1   | 85        | <i>Catharanthus roseus</i>   | $\beta$ -amyrin, $\alpha$ -amyrin, lupeol   | C-28 oxidation (three steps)                                   | <sup>14</sup>   |
| CYP716Y1    | 85        | <i>Bupleurum falcatum</i>    | $\beta$ -amyrin                             | C-16 $\alpha$ hydroxylation                                    | <sup>15</sup>   |
| CYP71A16    | 71        | <i>Arabidopsis thaliana</i>  | marneral, marnerol                          | C-23 hydroxylation                                             | <sup>2,16</sup> |
| CYP71D353   | 71        | <i>Lotus japonicus</i>       | dihydrolupeol                               | C-20 hydroxylation + C-28 oxidation (three steps)              | <sup>17</sup>   |
| CYP72A154   | 72        | <i>Glycyrrhiza uralensis</i> | $\beta$ -amyrin and 11-oxo- $\beta$ -amyrin | C-30 oxidation (three steps)                                   | <sup>18</sup>   |
| CYP72A61v2  | 72        | <i>Medicago truncatula</i>   | 24-hydroxy- $\beta$ -amyrin                 | C-22 $\beta$ hydroxylation                                     | <sup>19</sup>   |
| CYP72A63    | 72        | <i>Medicago truncatula</i>   | $\beta$ -amyrin                             | C-30 oxidation (three steps)                                   | <sup>18</sup>   |
| CYP72A67    | 72        | <i>Medicago truncatula</i>   | oleanolic acid                              | C-2 $\beta$ hydroxylation                                      | <sup>20</sup>   |

| Gene name  | P450 Clan | Species                      | Substrate                     | Reaction                               | Reference        |
|------------|-----------|------------------------------|-------------------------------|----------------------------------------|------------------|
| CYP72A68v2 | 72        | <i>Medicago truncatula</i>   | oleanolic acid                | C-23 oxidation (three steps)           | <sup>19,20</sup> |
| CYP81Q58   | 71        | <i>Cucumis sativus</i>       | 19-hydroxy cucurbitadienol    | C-25 hydroxylation + double bond shift | <sup>4,21</sup>  |
| CYP87D16   | 85        | <i>Maesa lanceolata</i>      | $\beta$ -amyrin               | C-16 $\alpha$ hydroxylation            | <sup>12</sup>    |
| CYP87D18   | 85        | <i>Siraitia grosvenorii</i>  | cucurbitadienol               | C-11 oxidation (two steps)             | <sup>22</sup>    |
| CYP88D6    | 85        | <i>Glycyrrhiza uralensis</i> | $\beta$ -amyrin               | C-11 oxidation (two steps)             | <sup>23</sup>    |
| CYP88L2    | 85        | <i>Cucumis sativus</i>       | cucurbitadienol               | C-19 hydroxylation                     | <sup>21</sup>    |
| CYP90B27   | 85        | <i>Veratrum californicum</i> | cholesterol                   | C-22 hydroxylation                     | <sup>24</sup>    |
| CYP90G1    | 85        | <i>Veratrum californicum</i> | 22-hydroxy-26-amincholesterol | C-22 oxidation                         | <sup>24</sup>    |
| CYP93E1    | 71        | <i>Glycine max</i>           | $\beta$ -amyrin               | C-24 hydroxylation                     | <sup>25</sup>    |
| CYP93E2    | 71        | <i>Medicago truncatula</i>   | $\beta$ -amyrin               | C-24 hydroxylation                     | <sup>7</sup>     |
| CYP93E3    | 71        | <i>Glycyrrhiza uralensis</i> | $\beta$ -amyrin               | C-24 hydroxylation                     | <sup>23</sup>    |
| CYP93E4    | 71        | <i>Arachis hypogaea</i>      | $\beta$ -amyrin               | C-24 hydroxylation                     | <sup>26</sup>    |
| CYP93E5    | 71        | <i>Cicer arietinum</i>       | $\beta$ -amyrin               | C-24 hydroxylation                     | <sup>26</sup>    |
| CYP93E6    | 71        | <i>Glycyrrhiza glabra</i>    | $\beta$ -amyrin               | C-24 hydroxylation                     | <sup>26</sup>    |
| CYP93E7    | 71        | <i>Lens culinaris</i>        | $\beta$ -amyrin               | C-24 hydroxylation                     | <sup>26</sup>    |
| CYP93E8    | 71        | <i>Pisum sativum</i>         | $\beta$ -amyrin               | C-24 hydroxylation                     | <sup>26</sup>    |
| CYP93E9    | 71        | <i>Phaseolus vulgaris</i>    | $\beta$ -amyrin               | C-24 hydroxylation                     | <sup>26</sup>    |
| CYP94N1    | 86        | <i>Veratrum californicum</i> | 22-hydroxycholesterol         | C-26 hydroxylation (2 steps)           | <sup>24</sup>    |

**Supplementary Table 2.** CYP716s from *C. asiatica* (a), *P. grandiflorus* (b) and *A. coerulea* (c) with the corresponding source dataset and identifier.

**(a) *C. asiatica***

| <b>Candidate</b> | <b>Dataset</b>    | <b>Contig</b>                       |
|------------------|-------------------|-------------------------------------|
| CYP716A83        | C asiatica v1     | CASRI1PC_Mira--CASRI1PC_rep_c2545   |
| CYP716A86        | C asiatica v1     | CASRI1PC_Mira--CASRI1PC_rep_c2559   |
| CYP716D36        | C asiatica v3     | CASRC1PC_Trinity--comp10341_c0_seq1 |
| CYP716E41        | C asiatica Ri1 v2 | CASRI1PC_Velvet--Singlet4514        |
| CYP716C11        | C asiatica v3     | CASRC1PC_Trinity--comp7390_c0_seq1  |
| CaCYP6           | C asiatica v3     | CASRC1PC_Trinity--comp27203_c0_seq1 |

**(b) *P. grandiflorus***

| <b>Candidate</b> | <b>Dataset</b>          | <b>Contig</b>                 |
|------------------|-------------------------|-------------------------------|
| CYP716A140       | Platycodon raw 454 data | GH8CB7O01EAKC9                |
| PgfCYP2          | Platycodon raw 454 data | GH8CB7O01A5ZR7                |
| CYP716S4         | Platycodon raw 454 data | GH8CB7O01BHER3                |
| CYP716A141       | Platycodon raw 454 data | GH8CB7O01EY7IN                |
| CYP716S5         | Platycodon raw 454 data | GH8CB7O01DXQ25                |
| CYP716S6         | Platycodon raw 454 data | GH8CB7O01E1LQD,GH8CB7O01CLUZD |

**(c) *A. coerulea***

| <b>Candidate</b> | <b>Dataset</b>      | <b>Contig</b>           |
|------------------|---------------------|-------------------------|
| CYP716A100       | A coerulea_195 v1.1 | AcoGoldSmith_v1.017422m |
| CYP716A101       | A coerulea_195 v1.1 | AcoGoldSmith_v1.004472m |
| CYP716A102       | A coerulea_195 v1.1 | AcoGoldSmith_v1.004198m |
| CYP716A103       | A coerulea_195 v1.1 | AcoGoldSmith_v1.019427m |
| CYP716A104       | A coerulea_195 v1.1 | AcoGoldSmith_v1.004259m |
| CYP716A105       | A coerulea_195 v1.1 | AcoGoldSmith_v1.005179m |
| CYP716A106P      | A coerulea_195 v1.1 | AcoGoldSmith_v1.004222m |
| CYP716A107       | A coerulea_195 v1.1 | AcoGoldSmith_v1.004290m |
| CYP716A108       | A coerulea_195 v1.1 | AcoGoldSmith_v1.003860m |
| CYP716A109       | A coerulea_195 v1.1 | AcoGoldSmith_v1.003815m |
| CYP716A110       | A coerulea_195 v1.1 | AcoGoldSmith_v1.004324m |
| CYP716A111       | A coerulea_195 v1.1 | AcoGoldSmith_v1.018242m |
| CYP716A112       | A coerulea_195 v1.1 | AcoGoldSmith_v1.019280m |
| CYP716A113v1     | A coerulea_195 v1.1 | AcoGoldSmith_v1.014336m |
| CYP716A113v2     | A coerulea_195 v1.1 | AcoGoldSmith_v1.022200m |
| CYP716A114R5v1   | A coerulea_195 v1.1 | AcoGoldSmith_v1.004506m |
| CYP716A114R5v2   | A coerulea_195 v1.1 | AcoGoldSmith_v1.004482m |
| CYP716A114       | A coerulea_195 v1.1 | AcoGoldSmith_v1.004418m |



**Supplementary Table 3.** Semi-quantitative analysis of CYP716 substrates and products in transformed yeasts. Shown are the relative amounts of the known triterpenoids in the producing yeast strains. Triterpenoids were analyzed and quantified from spent medium of M $\beta$ CD-treated yeast cultures. The values correspond to means of peak areas of extracted ion intensities of representative ions  $\pm$  standard error (n=4).

| Compound                               |                                       |                                   |                                             |                                      |                                                          |                                                         |                                                      |                                     |                                                        |                                                     |  |
|----------------------------------------|---------------------------------------|-----------------------------------|---------------------------------------------|--------------------------------------|----------------------------------------------------------|---------------------------------------------------------|------------------------------------------------------|-------------------------------------|--------------------------------------------------------|-----------------------------------------------------|--|
| Yeast strain                           | $\beta$ -amyrin<br>[218] <sup>+</sup> | erythrodiol<br>[496] <sup>+</sup> | oleanolic<br>aldehyde<br>[203] <sup>+</sup> | oleanolic acid<br>[203] <sup>+</sup> | 16 $\beta$ -OH $\beta$ -<br>amyrin<br>[216] <sup>+</sup> | 16 $\beta$ -OH-<br>oleanolic acid<br>[318] <sup>+</sup> | 12,13-epoxy<br>$\beta$ -amyrin<br>[514] <sup>+</sup> | maslinic acid<br>[203] <sup>+</sup> | 6 $\beta$ -OH-<br>oleanolic acid<br>[203] <sup>+</sup> | 6 $\beta$ OH<br>maslinic acid<br>[320] <sup>+</sup> |  |
| 1/ EV                                  |                                       |                                   |                                             |                                      |                                                          |                                                         |                                                      |                                     |                                                        |                                                     |  |
| 2/ BAS                                 | 1733 $\pm$ 206                        |                                   |                                             |                                      |                                                          |                                                         |                                                      |                                     |                                                        |                                                     |  |
| 3/ BAS+CYP716A86                       | 1796 $\pm$ 154                        | 94 $\pm$ 5                        | 0 $\pm$ 0                                   | 14 $\pm$ 4                           |                                                          |                                                         |                                                      |                                     |                                                        |                                                     |  |
| 4/ BAS+CYP716A83                       | 487 $\pm$ 49                          | 454 $\pm$ 10                      | 1365 $\pm$ 148                              | 5165 $\pm$ 98                        |                                                          |                                                         |                                                      |                                     |                                                        |                                                     |  |
| 10/ BAS+CYP716A83+CYP716E41            | 626 $\pm$ 33                          | 444 $\pm$ 29                      | 1025 $\pm$ 121                              | 1278 $\pm$ 189                       |                                                          |                                                         |                                                      |                                     | 555 $\pm$ 313                                          |                                                     |  |
| 11/ BAS+CYP716A83+CYP716C11            | 611 $\pm$ 174                         | 412 $\pm$ 25                      | 1031 $\pm$ 80                               | 512 $\pm$ 41                         |                                                          |                                                         |                                                      | 2879 $\pm$ 153                      |                                                        |                                                     |  |
| 14/ BAS+CYP716A83+CYP716E41+CYP716C11  | 430 $\pm$ 31                          | 440 $\pm$ 47                      | 896 $\pm$ 123                               | 293 $\pm$ 27                         |                                                          |                                                         |                                                      | 307 $\pm$ 41                        | 0 $\pm$ 0                                              | 142 $\pm$ 58                                        |  |
| 30/ BAS+CYP716A140                     | 184 $\pm$ 12                          | 72 $\pm$ 6                        | 862 $\pm$ 87                                | 3389 $\pm$ 145                       |                                                          |                                                         |                                                      |                                     |                                                        |                                                     |  |
| 32/ BAS+CYP716A141                     | 447 $\pm$ 42                          | 6 $\pm$ 3                         | 93 $\pm$ 16                                 | 112 $\pm$ 16                         | 10786 $\pm$ 404                                          | 142 $\pm$ 35                                            |                                                      |                                     |                                                        |                                                     |  |
| 33/ BAS+CYP716AS5                      | 1976 $\pm$ 205                        |                                   |                                             |                                      |                                                          |                                                         | 43 $\pm$ 4                                           |                                     |                                                        |                                                     |  |
| 36/ BAS+CYP716A140+CYP716A141          | 122 $\pm$ 17                          | 36 $\pm$ 5                        | 421 $\pm$ 66                                | 813 $\pm$ 89                         | 1033 $\pm$ 50                                            | 488 $\pm$ 122                                           |                                                      |                                     |                                                        |                                                     |  |
| 37/ BAS+CYP716A140+CYP716S5            | 304 $\pm$ 23                          | 82 $\pm$ 7                        | 615 $\pm$ 170                               | 3981 $\pm$ 222                       |                                                          |                                                         |                                                      |                                     |                                                        |                                                     |  |
| 39/ BAS+CYP716A140+CYP716A141+CYP716S5 | 128 $\pm$ 13                          | 44 $\pm$ 4                        | 460 $\pm$ 47                                | 1004 $\pm$ 90                        | 1048 $\pm$ 47                                            | 505 $\pm$ 126                                           |                                                      |                                     |                                                        |                                                     |  |
| 46/ BAS+CYP716A110                     | 1154 $\pm$ 137                        | 525 $\pm$ 96                      | 452 $\pm$ 116                               | 1000 $\pm$ 220                       |                                                          |                                                         |                                                      |                                     |                                                        |                                                     |  |
| 47/ BAS+CYP716A111                     | 1997 $\pm$ 137                        |                                   |                                             |                                      | 507 $\pm$ 22                                             |                                                         |                                                      |                                     |                                                        |                                                     |  |

**Supplementary Table 4.** List of primers used in this study.

|             | Primer                                                     | Sequence                                                       |
|-------------|------------------------------------------------------------|----------------------------------------------------------------|
| Centella    | CYP716A86F                                                 | GGGGACAAGTTTGTACAAAAAAGCAGGCTTAATGGAGTTGCTTTCCTCTTATGC         |
|             | CYP716A86R                                                 | GGGGACCACTTTGTACAAGAAAGCTGGGTATTAGGCCTTGTGAGGAAAGAGG           |
|             | CYP716A83F                                                 | GGGGACAAGTTTGTACAAAAAAGCAGGCTTAATGGAACCTTCTTTGTTCCCC           |
|             | CYP716A83R                                                 | GGGGACCACTTTGTACAAGAAAGCTGGGTATTAGGCTTTATGTGGAAATAGACGA        |
|             | CYP716D36F                                                 | GGGGACAAGTTTGTACAAAAAAGCAGGCTTAATGTTGAGCTCGTTGCTAGTTGTC        |
|             | CYP716D36R                                                 | GGGGACCACTTTGTACAAGAAAGCTGGGTATCAAACCTTGTGAGGTTGAAGC           |
|             | CYP716E41F                                                 | GGGGACAAGTTTGTACAAAAAAGCAGGCTTAATGAGTTTATTCTCAGATGTTGTTCTTC    |
|             | CYP716E41R                                                 | GGGGACCACTTTGTACAAGAAAGCTGGGTACTAGTTTTTATGAGGCACAAGACGA        |
|             | CYP716C11F                                                 | GGGGACAAGTTTGTACAAAAAAGCAGGCTTAATGGACTTGTTTCTACCTCTCGTGT       |
|             | CYP716C11R                                                 | GGGGACCACTTTGTACAAGAAAGCTGGGTACTAGTGAGGATGCAGTCGGATT           |
|             | Platyodon                                                  | CYP716A140F                                                    |
| CYP716A140R |                                                            | GGGGACCACTTTGTACAAGAAAGCTGGGTATTAAGCTTTATGTGGATAGAGGCG         |
| CYP716S4F   |                                                            | GGGGACAAGTTTGTACAAAAAAGCAGGCTTAATGGATCTTTTCTCTCATCAGCCCTAGTAGT |
| CYP716S4R   |                                                            | GGGGACCACTTTGTACAAGAAAGCTGGGTATTACTGATCATGGGATAGCAGGC          |
| CYP716A141F |                                                            | GGGGACAAGTTTGTACAAAAAAGCAGGCTTAATGGATTCCCTCTTCATCATCA          |
| CYP716A141R |                                                            | GGGGACCACTTTGTACAAGAAAGCTGGGTATCATGCCTTGTGAGGAATGAG            |
| CYP716S5F   |                                                            | GGGGACAAGTTTGTACAAAAAAGCAGGCTTAATGGATCTCCTTCTCTCATCAACC        |
| CYP716S5R   |                                                            | GGGGACCACTTTGTACAAGAAAGCTGGGTATTAGTTTCCATTGTTGTCGTCG           |
| CYP716S6F   |                                                            | GGGGACAAGTTTGTACAAAAAAGCAGGCTTAATGGATGTTCTTCTCTCATCAACCCTAC    |
| CYP716S6R   |                                                            | GGGGACCACTTTGTACAAGAAAGCTGGGTATCATGCATGAGCTAGCAGGC             |
| RACE3       |                                                            | GCTCGCGAGCGCGTTTAAACGCGCACGCGTTTTTTTTTTTTTTTTTTTTV             |
| Aquilegia   | CYP716A100F                                                | GGGGACAAGTTTGTACAAAAAAGCAGGCTTAATGGAGATCAATTTTACTACACTTTC      |
|             | CYP716A100R                                                | GGGGACCACTTTGTACAAGAAAGCTGGGTATTAATAAAGCTGAGGCTGCAGTCG         |
|             | CYP716A100INT1F                                            | CTCATATCTACAATGAAGTCCGTAAAGAACAATGGAGATTGTAAAGTCAAAG           |
|             | CYP716A100INT1R                                            | CTTTTGACTTTACAATCTCCATTTGTTCTTTACGGACTTCATTGTAGATATGAG         |
|             | CYP716A100INT2F                                            | CATACAATCCAAAAGGATGGAAGTTATATTGGAGTGGGAATACAACACAT             |
|             | CYP716A100INT2R                                            | ATGTGTTGATTCCCACTCCAATATAACTTCCATCCTTTTGGAAATTGTATG            |
|             | CYP716A102F                                                | GGGGACAAGTTTGTACAAAAAAGCAGGCTTAATGGAGCTATTAGTCTAATTTCTCTTC     |
|             | CYP716A102R                                                | GGGGACCACTTTGTACAAGAAAGCTGGGTATTAGGATTTGTGCGGCAAG              |
|             | CYP716A102INT1F                                            | CATGTCTACGACAACGTTCTAAAAGAACAACAGAAATCGCAAAGTCAA               |
|             | CYP716A102INT1R                                            | TTGACTTTGCGATTTCTGTTTCTTTTAGAACGTTGTCGTAGACATG                 |
|             | CYP716A102INT2F                                            | GGATTTTCTATTCTAAAGGATGGAAGATCTATTGGAATGCATACTCAACACAC          |
|             | CYP716A102INT2R                                            | GTGTGTTGAGTATGCATTCCAATAGATCTTCCATCCTTTAGGAATAGAAAATCC         |
|             | CYP716A103F                                                | GGGGACAAGTTTGTACAAAAAAGCAGGCTTAATGGAGCTGATCATAGTCGTCC          |
|             | CYP716A103R                                                | GGGGACCACTTTGTACAAGAAAGCTGGGTATTAGGATTTGTGCGGCAAGA             |
|             | CYP716A103INT1F                                            | CCCATGTCTACGACAAAGTTCTAGAAGAACAACACTGAAATCGCAATGTCA            |
|             | CYP716A103INT1R                                            | TGACATTGCGATTTAGTTTCTTCTAGAACTTTGTCGTAGACATGGG                 |
|             | CYP716A103INT2F                                            | GGATTTTTTATTCTAAAGGATGGAAGATCTATTGGAATGCATACTCAACACA           |
|             | CYP716A103INT2R                                            | TGTGTTGAGTATGCATTCCAATAGATCTTCCATCCTTTAGGAATAAAAAATCC          |
|             | CYP716A105F                                                | GGGGACAAGTTTGTACAAAAAAGCAGGCTTAATGGAGCTTATCTTGTGTCCATT         |
|             | CYP716A105R                                                | GGGGACCACTTTGTACAAGAAAGCTGGGTATTAGGAACATTGTGTCTGAAGTCG         |
|             | CYP716A107F                                                | GGGGACAAGTTTGTACAAAAAAGCAGGCTTAATGGAGGTTATCTTGTGTCCATT         |
| CYP716A107R | GGGGACCACTTTGTACAAGAAAGCTGGGTACTAGCATTGCGCTTGAAGTCG        |                                                                |
| CYP716A109F | GGGGACAAGTTTGTACAAAAAAGCAGGCTTAATGTTCTTGAATTCCTCAACAC      |                                                                |
| CYP716A109R | GGGGACCACTTTGTACAAGAAAGCTGGGTATTATTGGTAATTACCAATATTGTGCTTC |                                                                |
| CYP716A110F | GGGGACAAGTTTGTACAAAAAAGCAGGCTTAATGGAGCAGATTTCACTTTCATG     |                                                                |
| CYP716A110R | GGGGACCACTTTGTACAAGAAAGCTGGGTATTAACAACCTTGTGGTTCTAGTCGG    |                                                                |
| CYP716A111F | GGGGACAAGTTTGTACAAAAAAGCAGGCTTAATGGGCATAAATCGACTAAACCTAT   |                                                                |

|        | Primer          | Sequence                                                            |
|--------|-----------------|---------------------------------------------------------------------|
| Aquila | CYP716A111R     | GGGGACCACTTTGTACAAGAAAGCTGGGTATTAAGGACATTGTGGTTGGAGTT               |
|        | CYP716A111INT1F | CCTCACATCTACGATGAAGTACTAAATGAGCAAATGGAGATCTTAAAGACTAAAAAAG          |
|        | CYP716A111INT1R | CTTTTTTAGTCTTTAAGATCTCCATTTGCTCATTTAGTACTTCATCGTAGATGTGAGG          |
|        | CYP716A111INT2F | CTCAATTCACAAAAGGCTGGAAGTTATATTGGAGCACGTATTCAACG                     |
|        | CYP716A111INT2R | CGTTGAATACGTGCTCCAATATAACTTCCAGCCTTTTGAATTGAG                       |
|        | CYP716A112F     | GGGGACAAGTTTGTACAAAAAAGCAGGCTTAATGGAGCTATACTCTTTTTCCATGTT           |
|        | CYP716A112R     | GGGGACCACTTTGTACAAGAAAGCTGGGTATCACTGTGGATGGAGCCG                    |
|        | CYP716A112INT1F | CATTTACAATGCAGTCCGAAAAGGAGCAAATGGAGATTCTAAAGTCCAA                   |
|        | CYP716A112INT1R | TTGGACTTTAGAATCTCCATTTGCTCCTTTGCGACTGCATTGTAAATG                    |
|        | CYP716A112INT2F | CAATTCGAAAAGGTGGAAGTTGATTTGAGCGCGATTTCTAC                           |
|        | CYP716A112INT2R | GTAGAAATCGCGCTCAAATACAACCTCCACCCTTTGGAATTG                          |
|        | CYP716A113v1F   | GGGGACAAGTTTGTACAAAAAAGCAGGCTTAATGGAGGTTATTTCTTTTCTATGC             |
|        | CYP716A113v1R   | GGGGACCACTTTGTACAAGAAAGCTGGGTATCAAGTACATTGTGGCTGGAGTC               |
|        | CYP716R5v2F     | GGGGACAAGTTTGTACAAAAAAGCAGGCTTAATGGAGTACTTGCTGTACATTTTCTTG          |
|        | CYP716R5v2R     | GGGGACCACTTTGTACAAGAAAGCTGGGTATTAATGGTGTGGTAAAGGTAGACAGG            |
|        | CYP716A114      | GGGGACAAGTTTGTACAAAAAAGCAGGCTTAATGGAGCTTATTAACAGCTTTTCCA            |
|        | CYP716A114      | GGGGACCACTTTGTACAAGAAAGCTGGGTATTAATGGAGCTTATTAACAGCTTTTCCA          |
| Other  | CYP716A83T2AR   | TTCCAAGGTCTCAGCATGTTAGCAGACTTCTCTGCCCTCGGCTTTATGTGGAAATAGACGA       |
|        | CYP716C115T2AF  | CCTTAAGGTCTCTATGCGGTGACGTGCGAGGAGAATCCTGGCCAATGGACTTGTCTACCTCTCGTGT |
|        | GGBAST2AR       | TTCCAAGGTCTCAGCATGTTAGCAGACTTCTCTGCCCTCAGTTAAACAACTGGAGTGGAAGG      |
|        | CaDDST2AR       | TTCCAACGTCTCAGCATGTTAGCAGACTTCTCTGCCCTCATTGGAGAGCCACAAGCGT          |
|        | MTR1T2AFF       | CCTTAACGTCTCTATGCGGTGACGTGCGAGGAGAATCCTGGCCAATGACTTCTTCCAATTCCGATTT |
|        | CaDDSF          | GGGGACAAGTTTGTACAAAAAAGCAGGCTTAATGTGGAAGCTGAAGATAGCA                |
|        | GgBASf          | GGGGACAAGTTTGTACAAAAAAGCAGGCTTAATGTGGAAGCTGAAGATAGCG                |
|        | MTR1R           | GGGGACCACTTTGTACAAGAAAGCTGGGTATCACCAGACATCCCTAAGG                   |
|        | pESC-DEST1      | TGATCAACAAGTTTGTACAAAAAAGCTGAACG                                    |
|        | pESC-DEST2      | GCTAGCACCACTTTGTACAAGAAAGCTGAACG                                    |
|        | combi1715       | TAATACGACTCACTATAGGG                                                |
|        | combi2287       | GGAATAAGGGCGACACGG                                                  |
|        | combi3244       | GTTAACC GGCCGCAAATTAAGCC                                            |
|        | combi3245       | GGGGACAAGTTTGTACAAAAAAGCAGGCTTAAGGGAACAAAAGCTGGAGC                  |
|        | combi3246       | GGGGACCACTTTGTACAAGAAAGCTGGGTAAAAGCCTTCGAGCGTCCC                    |
|        | combi3247       | GTTAAC GCTAGCGAGGGAACAAAAGCTGGAGC                                   |
|        | crispr014       | AGAGTTCCTCGGTTTGCCGATCATTTATCTTTCACTGCGGAGAAG                       |
|        | crispr031       | GGCAAACCGAGGAAGTCTGTTTTAGAGCTAGAAATAGCAAGTTAAAATAAGG                |
|        | crispr059       | AAGTGCATGGAGATGAGTCGTGGCATTAAACAGAGTTCTCGGTTTGCCAGTTATT             |
|        | crispr060       | AATAACTGGCAAACCGAGGAAGTCTGTTATTAATGCCACGACTCATCTCCATGCAGTT          |
|        | SICAS F         | GGGGACAAGTTTGTACAAAAAAGCAGGCTATGTGGAAGTTGAAAGTAGCAGAAGG             |
|        | SICAS R         | GGGGACCACTTTGTACAAGAAAGCTGGGT TCAATTAGCTTTGAGTACATGAGCGC            |
|        | attB1 MTR1 F    | GGGGACAAGTTTGTACAAAAAAGCAGGCTTAATGACTTCTTCCAATTCCG                  |
|        | attB2 MTR1 R    | GGGGACCACTTTGTACAAGAAAGCTGGGTATCACCAGACATCCCTAAGG                   |

**Supplementary Table 5.** Cloning scheme for *A. coerulea* CYP716s from genomic DNA.

| Candidate  | PCR of genomic sequence<br>from gDNA |                | PCR of exons<br>from genomic fragments |                 | PCR of ORFs<br>from cDNA |                |
|------------|--------------------------------------|----------------|----------------------------------------|-----------------|--------------------------|----------------|
|            | Forward primer                       | Reverse primer | Forward primer                         | Reverse primer  | Forward primer           | Reverse primer |
| CYP716A100 | CYP716A100F                          | CYP716A100R    | -                                      | -               | CYP716A100F              | CYP716A100R    |
| exon1      | -                                    | -              | CYP716A100F                            | CYP716A100INT1R | -                        | -              |
| exon2      | -                                    | -              | CYP716A100INT1F                        | CYP716A100INT2R | -                        | -              |
| exon3      | -                                    | -              | CYP716A100INT2F                        | CYP716A100R     | -                        | -              |
| CYP716A102 | CYP716A102F                          | CYP716A102R    | -                                      | -               | CYP716A102F              | CYP716A102R    |
| exon1      | -                                    | -              | CYP716A102F                            | CYP716A102INT2R | -                        | -              |
| exon2      | -                                    | -              | CYP716A102INT1F                        | CYP716A102INT2R | -                        | -              |
| exon3      | -                                    | -              | CYP716A102INT2F                        | CYP716A102R     | -                        | -              |
| CYP716A103 | CYP716A103F                          | CYP716A103R    | -                                      | -               | CYP716A103F              | CYP716A103R    |
| exon1      | -                                    | -              | CYP716A103F                            | CYP716A103INT2R | -                        | -              |
| exon2      | -                                    | -              | CYP716A103INT1F                        | CYP716A103INT2R | -                        | -              |
| exon3      | -                                    | -              | CYP716A103INT2F                        | CYP716A103R     | -                        | -              |
| CYP716111  | CYP716111F                           | CYP716111R     | -                                      | -               | CYP716111F               | CYP716111R     |
| exon1      | -                                    | -              | CYP716111F                             | CYP716111INT2R  | -                        | -              |
| exon2      | -                                    | -              | CYP716111INT1F                         | CYP716111INT2R  | -                        | -              |
| exon3      | -                                    | -              | CYP716111INT2F                         | CYP716111R      | -                        | -              |
| CYP716112  | CYP716112F                           | CYP716112R     | -                                      | -               | CYP716112F               | CYP716112R     |
| exon1      | -                                    | -              | CYP716112F                             | CYP716112INT2R  | -                        | -              |
| exon2      | -                                    | -              | CYP716112INT1F                         | CYP716112INT2R  | -                        | -              |
| exon3      | -                                    | -              | CYP716112INT2F                         | CYP716112R      | -                        | -              |

**Supplementary Table 6.** Yeast strains used in this study. EV: empty vector; n/a: not analyzed.

|                    | Strain                 | Plasmids       |                |                |                         |                         |    |
|--------------------|------------------------|----------------|----------------|----------------|-------------------------|-------------------------|----|
|                    |                        | PA14           | pESC-URA       | pAG423         | pAG424                  | pAG425                  |    |
| <i>C. asiatica</i> | 1                      |                | EV             | EV             | EV                      | EV                      |    |
|                    | 2                      |                | GgBAS T2A MTR1 | EV             | EV                      | EV                      |    |
|                    | 3                      |                | GgBAS T2A MTR1 | CYP716A86      | EV                      | EV                      |    |
|                    | 4                      |                | GgBAS T2A MTR1 | EV             | CYP716A83               | EV                      |    |
|                    | 5                      |                | GgBAS T2A MTR1 | CYP716D36      | EV                      | EV                      |    |
|                    | 6                      |                | GgBAS T2A MTR1 | CYP716E41      | EV                      | EV                      |    |
|                    | 7                      |                | GgBAS T2A MTR1 | CYP716C11      | EV                      | EV                      |    |
|                    | 8                      |                | GgBAS T2A MTR1 | CYP716A86      | CYP716A83               | EV                      |    |
|                    | 9                      |                | GgBAS T2A MTR1 | CYP716D36      | CYP716A83               | EV                      |    |
|                    | 10                     |                | GgBAS T2A MTR1 | CYP716E41      | CYP716A83               | EV                      |    |
|                    | 11                     |                | GgBAS T2A MTR1 | CYP716C11      | CYP716A83               | EV                      |    |
|                    | 14                     |                | GgBAS T2A MTR1 | CYP716E41      | CYP716A83 T2A CYP716C11 | EV                      |    |
|                    | 15                     |                | GgBAS T2A MTR1 | CYP716E41      | CYP716D36               | CYP716A83 T2A CYP716C11 |    |
|                    | 16                     |                | CaDDS T2A MTR1 | EV             | EV                      | EV                      |    |
|                    | 17                     |                | CaDDS T2A MTR1 | CYP716A86      | EV                      | EV                      |    |
|                    | 18                     |                | CaDDS T2A MTR1 | EV             | CYP716A83               | EV                      |    |
|                    | 19                     |                | CaDDS T2A MTR1 | CYP716D36      | EV                      | EV                      |    |
|                    | 20                     |                | CaDDS T2A MTR1 | CYP716E41      | EV                      | EV                      |    |
|                    | 21                     |                | CaDDS T2A MTR1 | CYP716C11      | EV                      | EV                      |    |
|                    | 22                     |                | CaDDS T2A MTR1 | CYP716A86      | CYP716A83               | EV                      |    |
|                    | 23                     |                | CaDDS T2A MTR1 | CYP716D36      | CYP716A83               | EV                      |    |
|                    | 24                     |                | CaDDS T2A MTR1 | CYP716E41      | CYP716A83               | EV                      |    |
|                    | 25                     |                | CaDDS T2A MTR1 | CYP716C11      | CYP716A83               | EV                      |    |
|                    | 28                     |                | CaDDS T2A MTR1 | CYP716E41      | CYP716A83 T2A CYP716C11 | EV                      |    |
|                    | 29                     |                | CaDDS T2A MTR1 | CYP716E41      | CYP716D36               | CYP716A83 T2A CYP716C11 |    |
|                    | <i>P. grandiflorus</i> | <b>PA14</b>    |                |                |                         |                         |    |
|                    |                        | 30             |                | GgBAS T2A MTR1 | CYP716A140              | EV                      | EV |
|                    |                        | 31             |                | GgBAS T2A MTR1 | EV                      | CYP716S4                | EV |
|                    |                        | 32             |                | GgBAS T2A MTR1 | EV                      | CYP716A141              | EV |
| 33                 |                        |                | GgBAS T2A MTR1 | EV             | EV                      | CYP716S5                |    |
| 34                 |                        |                | GgBAS T2A MTR1 | EV             | CYP716S6                | EV                      |    |
| 35                 |                        |                | GgBAS T2A MTR1 | CYP716A140     | CYP716S4                | EV                      |    |
| 36                 |                        |                | GgBAS T2A MTR1 | CYP716A140     | CYP716A141              | EV                      |    |
| 37                 |                        |                | GgBAS T2A MTR1 | CYP716A140     | EV                      | CYP716S5                |    |
| 38                 |                        |                | GgBAS T2A MTR1 | CYP716A140     | CYP716S6                | EV                      |    |
| 39                 |                        | GgBAS T2A MTR1 | CYP716A140     | CYP716A141     | CYP716S5                |                         |    |
| <i>A. coerulea</i> | <b>PA14</b>            |                |                |                |                         |                         |    |
|                    | 40                     |                | GgBAS T2A MTR1 | CYP716A100     | EV                      | EV                      |    |
|                    | 41                     |                | GgBAS T2A MTR1 | CYP716A102     | EV                      | EV                      |    |
|                    | 42                     |                | GgBAS T2A MTR1 | CYP716A103     | EV                      | EV                      |    |
|                    | 43                     |                | GgBAS T2A MTR1 | CYP716A105     | EV                      | EV                      |    |
|                    | 44                     |                | GgBAS T2A MTR1 | CYP716A107     | EV                      | EV                      |    |
|                    | 45                     |                | GgBAS T2A MTR1 | CYP716A109     | EV                      | EV                      |    |
|                    | 46                     |                | GgBAS T2A MTR1 | CYP716A110     | EV                      | EV                      |    |
|                    | 47                     |                | GgBAS T2A MTR1 | CYP716A111     | EV                      | EV                      |    |
|                    | 48                     |                | GgBAS T2A MTR1 | CYP716A112     | EV                      | EV                      |    |
| 49                 |                        | GgBAS T2A MTR1 | CYP716A113v1   | EV             | EV                      |                         |    |

|                    | Strain     |                | Plasmids     |        |        |
|--------------------|------------|----------------|--------------|--------|--------|
|                    | PA14       | pESC-URA       | pAG423       | pAG424 | pAG425 |
|                    | 50         | GgBAS T2A MTR1 | CYP716R5v2   | EV     | EV     |
|                    | 51         | GgBAS T2A MTR1 | CYP716A114   | EV     | EV     |
|                    | <b>Tm1</b> |                |              |        |        |
| <i>A. coerulea</i> | 52         | EV             | CYP716A100   | n/a    | MTR1   |
|                    | 53         | EV             | CYP716A102   | n/a    | MTR1   |
|                    | 54         | EV             | CYP716A103   | n/a    | MTR1   |
|                    | 55         | EV             | CYP716A105   | n/a    | MTR1   |
|                    | 56         | EV             | CYP716A107   | n/a    | MTR1   |
|                    | 57         | EV             | CYP716A109   | n/a    | MTR1   |
|                    | 58         | EV             | CYP716A110   | n/a    | MTR1   |
|                    | 59         | EV             | CYP716A111   | n/a    | MTR1   |
|                    | 60         | EV             | CYP716A112   | n/a    | MTR1   |
|                    | 61         | EV             | CYP716A113v2 | n/a    | MTR1   |
|                    | 62         | EV             | CYP716R5v2   | n/a    | MTR1   |
|                    | 63         | EV             | CYP716A114   | n/a    | MTR1   |
|                    | 64         | SICAS          | n/a          | n/a    | n/a    |
|                    | 65         | SICAS          | CYP716A100   | n/a    | MTR1   |
|                    | 66         | SICAS          | CYP716A102   | n/a    | MTR1   |
|                    | 67         | SICAS          | CYP716A103   | n/a    | MTR1   |
|                    | 68         | SICAS          | CYP716A105   | n/a    | MTR1   |
|                    | 69         | SICAS          | CYP716A107   | n/a    | MTR1   |
|                    | 70         | SICAS          | CYP716A109   | n/a    | MTR1   |
|                    | 71         | SICAS          | CYP716A110   | n/a    | MTR1   |
|                    | 72         | SICAS          | CYP716A111   | n/a    | MTR1   |
|                    | 73         | SICAS          | CYP716A112   | n/a    | MTR1   |
|                    | 74         | SICAS          | CYP716A113v1 | n/a    | MTR1   |
|                    | 75         | SICAS          | CYP716R5v2   | n/a    | MTR1   |
|                    | 76         | SICAS          | CYP716A114   | n/a    | MTR1   |

## Supplementary Methods

### NMR analysis

#### For 6 $\beta$ -hydroxy maslinic acid

First, when comparing the 1D  $^1\text{H}$  spectra of the plant metabolite and the maslinic acid standard (Supplementary Methods Fig. 1a, b) it is clear that both spectra are highly similar. This is the case for both the protons at high chemical shifts ( $\text{H}_{12}$ ,  $\text{H}_2$ ,  $\text{H}_3$  and  $\text{H}_{18}$ ), as well as the collection of signals in the aliphatic region, despite signal overlap. Furthermore, comparison of the seven methyl signals shows that for the metabolite only two methyl signals remain at identical chemical shift values as the corresponding methyl ( $\text{CH}_3$ ) groups in the standard. Subsequent analysis shows that the assignment of these two signals correspond to  $\text{CH}_3$  groups 29 and 30. (Supplementary Methods Fig. 1c). This similarity makes it likely that the additional functionality will be residing in the A, B or C ring and not in D or E. Lastly, in the 1D  $^1\text{H}$  spectrum of the metabolite a single additional signal can be observed at 4.47 ppm that integrates for a single proton (Supplementary Methods Fig. 1b). The corresponding CH-type carbon can be identified at 68.6 ppm from the HSQC spectrum. The presence of this signal with a characteristic chemical shift indicates the additional functionality because the oxidation most likely corresponds with a hydroxyl (OH) group and not an epoxide. In the case of the latter, an additional  $^1\text{H}$  signal should be present as well, showing similar  $^1\text{H}$  and  $^{13}\text{C}$  chemical shift values. This preliminary hypothesis is subsequently supported by further analysis using the 2D spectra.

In the following, focus is placed on the identification of the modification at position 6, given both the standard and metabolite are otherwise very similar in terms of structure and assignment.

First, the  $\text{CH}_3$  groups 23 and 24 can be identified via their highly similar coupling pattern in the HMBC spectrum (Supplementary Methods Fig. 2a). Here, they both show couplings to each other's carbon atoms, as well as to carbon atoms C4 (41.1 ppm), C5 (57.0 ppm) and C3 (84.6 ppm). Here, the  $^3\text{J}_{\text{CH}}$ -coupling to C3 is the unique identifier for methyls 23 and 24, because these are the only ones close enough to carbon C3. In addition, C3 and C2 and their corresponding protons (2.84 and 3.67 ppm, respectively, in the  $^1\text{H}$  dimension) are the only two OH-containing locations in both molecules that also show a mutual coupling in the COSY experiment, hereby further establishing their assignment (Supplementary Methods Fig. 2b). A further distinction between C4 and C5 can be made with the help of methyl 25, because C5 is the only carbon in this section of the molecules that shows a clear set of through-bond couplings to the three  $\text{CH}_3$  groups Me23, Me24 and Me25. The corresponding H5 proton can be identified at 0.82 ppm using the HSQC spectrum.

Once H5 has been identified in the maslinic acid standard, the COSY spectrum shows a clear cross peak to the protons at positions 6, which in turn couple to the protons at position 7. In the HSQC spectrum, both sets of protons indeed correspond to methylene ( $\text{CH}_2$ ) groups at 19.4 ppm (C6) and 33.72 ppm (C7) in the  $^{13}\text{C}$  dimension. However, in the plant metabolite, the  $\text{CH}_2$  signal corresponding to C6 has disappeared and the  $\text{CH}_2$  signal of C7 also appears to be absent from its

original position (Supplementary Methods Fig. 2C). Starting from H5 in the COSY spectrum, the H6 signal turns out to correspond to the new  $^1\text{H}$  signal at 4.47 ppm. In turn, the HSQC spectrum shows that this signal corresponds to the new CH-type of carbon (68.6 ppm) previously observed (Supplementary Methods Fig. 2d).

This H6 proton signal further shows cross peaks in the COSY spectrum to the protons of the H7  $\text{CH}_2$  group now residing at 41.6 ppm in the  $^{13}\text{C}$  dimension (Supplementary Methods Fig. 2b,c). The identity of C7 can be further confirmed by a  $^3\text{JCH}$  coupling in the HMBC spectrum to  $\text{CH}_3$  group 26, which in turn and together with methyl 27, also shows through-bond couplings in the HMBC spectrum to C8 (39.93 ppm) and C14 (43.43 ppm). In summary, from the analysis of the different spectra, it appears that the original  $\text{CH}_2$  group at position 6 has now become a CH-group at significant higher chemical shift (19.4 to 68.6 ppm). Here, the latter value is characteristic for the presence of a hydroxyl functionality. In addition, the  $\text{CH}_2$  group at position 7 is also shifted to a higher chemical shift value (33.72 to 41.6 ppm), again characteristic for a strong electronegative element in the vicinity. Other carbon and proton chemical shifts in the immediate vicinity only show minimal differences with the maslinic acid standard, confirming that position 6 is indeed the only modification site. Furthermore since only position 6 can be identified as a CH-type carbon, the presence of an epoxide functionality can be excluded, because this would require at least two CH-type carbons both at position 6 and 7.

Concerning the stereochemistry of the new OH group, the ROESY spectrum shows a clear through-space contact between the H5 and H6 proton (Supplementary Methods Fig. 2e). Given the fact that the H5 stereochemistry is known, the H6 proton is expected to also reside on the same side of its A-B ring system. Other through-space contacts that can be observed starting from H6 involve  $\text{CH}_3$  groups 23/24, and the protons of position 7. One of the  $\text{CH}_3$  groups resides on the same side of the ring system and will be closer to H6. The other  $\text{CH}_3$  group is situated above the ring plane, hence further away, and hereby explaining the difference in relative through-space contact intensity between the two  $\text{CH}_3$  groups and H6. A completely similar observation can be made for the rOe contacts between H6 and the two protons of position 7.

The remainder of the assignment is completely similar to that of the maslinic acid standard, thereby also excluding the possibility of other additional modification sites. Finally, the structure of the plant metabolite thus appears to correspond to the known  $6\beta$ -hydroxy maslinic acid compound<sup>27</sup>. Comparison of the reported chemical shifts with the ones obtained in this analysis provided final proof of the similarity between the two molecules (Supplementary Methods Table 1). Given  $\text{C}_5\text{H}_5\text{N-d}_5$  was used as solvent in the literature and the aromatic nature of this solvent may induce significant changes in the  $^1\text{H}$  chemical shifts, only the  $^{13}\text{C}$  shifts are compared. This effect however is less pronounced for  $^{13}\text{C}$ . It is clear that despite a constant offset of about 0.58 ppm (Supplementary Methods Fig. 3), the  $^{13}\text{C}$  chemical shift values of the plant metabolite are in good



agreement with the reported chemical shifts of 6 $\beta$ -hydroxy maslinic acid (Supplementary Methods Table 1), especially surrounding the modification area (positions 5, 6 and 7).

### **For 16 $\beta$ -hydroxy $\beta$ -amyrin**

Similar to the 6 $\beta$ -hydroxy maslinic acid metabolite, a complete assignment of the 16 $\beta$ -hydroxy  $\beta$ -amyrin (Supplementary Methods Fig. 4a) was possible. While the assignment indeed showed the molecule in question to correspond to a beta-amyrin, in the following description only the identification strategy of the hydroxylation position will be discussed.

From the 1D  $^1\text{H}$  spectrum (Supplementary Methods Fig. 4b,c), the protons corresponding to H3, H12 and the modification location (H16 or H21) are expected to correspond to the three signals showing a higher chemical shift. In addition, the seven methyl signals, with the exception of two, can be separately observed as singlets integrating for three protons each. In the structure of 16 $\beta$ -hydroxy  $\beta$ -amyrin, these  $\text{CH}_3$  groups are well distributed throughout the molecule and identification of each allows an unambiguous assignment of the local chemical environment, mainly using the HMBC spectra. This assignment strategy is similar to the one used in a previous study on 3-O-Glc-echinocystic acid<sup>15</sup>. Once the different carbon/proton signals are identified, the corresponding proton/carbon signal can be assigned using the HSQC spectrum (Supplementary Methods Fig. 5). This assignment strategy allows for a fast check of positions 16 and 21, most expected to be hydroxylated.

In this respect, the first  $\text{CH}_3$  group readily identified is methyl 27. This is the only  $\text{CH}_3$  group to show a  $^3\text{J}_{\text{CH}}$  correlation with the quaternary alkene-type carbon 13 at 145.3 ppm in the HMBC spectrum (Supplementary Methods Fig. 5a). The other characteristic alkene CH unit (H12) can be identified at 5.25 and 123.36 ppm in the  $^1\text{H}$  and  $^{13}\text{C}$  dimension, respectively.

All other  $\text{CH}_3$  groups are structurally sufficiently well removed from methyl 27 (1.24 and 27.53 ppm in the  $^1\text{H}$  and  $^{13}\text{C}$  dimension, respectively) for it to be used as an unambiguous starting point for the assignment (Supplementary Methods Fig. 5a). Methyl 27 shares two correlations with carbons 8 and 14 with methyl 26, which allows a subsequent identification of the latter at 1.03 and 17.46 ppm in the  $^1\text{H}$  and  $^{13}\text{C}$  dimension, respectively. A distinction between C8 and C14 is readily available due to a  $^3\text{J}_{\text{CH}}$  correlation from H12 with C14 (Supplementary Methods Fig. 5b), with C8 being too far removed to show any correlation with the former. Next, a shared  $^3\text{J}_{\text{CH}}$  correlation with methyl 26 to carbon 9 at 48.3 ppm identifies  $\text{CH}_3$  group 25 (0.98 and 15.93 ppm in the  $^1\text{H}$  and  $^{13}\text{C}$  dimension, respectively). The identity of C9 can be further confirmed by means of a  $^3\text{J}_{\text{CH}}$  correlation again with H12 (Supplementary Methods Fig. 5b).

The last  $\text{CH}_3$  groups in this series, 23 and 24, can be assigned using a  $^3\text{J}_{\text{CH}}$  correlation with C5 (56.78 ppm), which they share with methyl 25 (Supplementary Methods Fig. 5a). The two corresponding signals can be identified at 0.99;0.79 ppm in the  $^1\text{H}$  and 28.66;16.16 ppm the  $^{13}\text{C}$  dimension. Nevertheless, a distinction between the two methyls is not possible due to an almost

identical chemical environment. Further confirmation is possible by a mutual  $^3J_{CH}$  correlation with the characteristic carbon signal of C3 at 79.76 ppm (Supplementary Methods Fig. 5a). The corresponding proton of C3 can be identified at 3.15 ppm using the HSQC spectrum. With this assignment, two of the three protons with a significant higher chemical shift are assigned.

For the remaining CH<sub>3</sub> groups, 28, 29 and 30, a clear distinction is more difficult because they do not share any correlations with mutual proton or carbon signals in contrast to all previous CH<sub>3</sub> groups. Nevertheless, CH18 allows here an identification of CH<sub>3</sub> group 28: starting from H12 in the HMBC spectrum, C18 can be identified via a  $^3J_{CH}$  correlation at 50.75 ppm (2.15 ppm for  $^1H$ ; Supplementary Methods Fig. 5b). Similarly, C18 shows a  $^3J_{CH}$  correlation with CH<sub>3</sub> 28 at 0.79 ppm in the  $^1H$  dimension where it overlaps with CH<sub>3</sub> groups 23 or 24 (Supplementary Methods Fig. 5d). Using the HSQC spectrum, the corresponding  $^{13}C$  signal can be identified at 22.23 ppm.

With all other CH<sub>3</sub> groups assigned, the methyl signals can be assigned to CH<sub>3</sub> groups 29 and 30 (0.92 and 0.89 for  $^1H$  and 24.32 and 33.68 for  $^{13}C$ , respectively). As is the case with 23 and 24, no distinction between the two is possible.

In the next step, the local chemical environment can be elucidated using the HMBC spectra. Here, special attention is given to the environment in the vicinity of CH<sub>3</sub> groups 27, 28 and 29/30, because these are located close to the possible hydroxylation sites. First, starting from CH<sub>3</sub> group 29/30, a number of correlations can be assigned. For instance, both  $^1H$  signals show a correlation with each other's  $^{13}C$  signal (Supplementary Methods Fig. 5c). The three remaining mutual correlations can all be assigned to C20, C21 and C19. Here, C20 can be correlated with the  $^{13}C$  signal at 31.58 ppm, because this does not correspond to any  $^1H$  signal in the HSQC spectrum and, hence, is a quaternary carbon atom. A distinction between the two remaining CH<sub>2</sub> groups 19 and 21 can be accomplished by a correlation in the COSY spectrum that shows a connection between the two nearest neighbors 19 and the previously assigned CH18. Using the HSQC spectrum, C19 can be assigned at 47.85 ppm in the  $^{13}C$  dimension, while C20 then corresponds to the last remaining  $^3J_{CH}$  correlation with CH<sub>3</sub> groups 29 and 30 at 31.58 ppm (Supplementary Methods Fig. 5d). From this chemical shift data, it can be concluded that the hydroxylation has not occurred at position 21, because the corresponding  $^{13}C$  chemical shift is too low (35.30 ppm experimental vs  $\pm 70$  to 90 ppm expected for a hydroxylated carbon atom), while the HSQC spectrum shows position 21 clearly to be a CH<sub>2</sub> unit and not CH, as would be in the case of hydroxylation (Supplementary Methods Fig. 5c).

Position 16 can be checked starting from CH<sub>3</sub> group 28. This CH<sub>3</sub> unit is expected to show correlations with CH<sub>2</sub> groups 22 and 16, CH18 and quaternary carbon atom 17 (Supplementary Methods Fig. 5d). From these coupling partners, CH18 has already been assigned at 50.65 ppm. From these three carbons, C17 can be identified at 38.54 ppm being a quaternary carbon atom with no correlations in the HSQC spectrum. A distinction between 22 and 16, both showing a  $^3J_{CH}$  coupling to CH<sub>3</sub> 28, has to be made based on local connectivity, because both correspond to a CH<sub>2</sub> type of carbon (Supplementary Methods Fig. 5c,d). This is for instance possible by starting from

position 21 previously assigned. Both protons of CH<sub>2</sub> 21 will show a <sup>2</sup>J<sub>CH</sub> coupling in the HMBC spectrum to the carbon of C22, while in addition, the same protons will also show a nearest neighbor correlation in the COSY spectrum (Supplementary Methods Fig. 5e). This allows position 22 to be assigned at 31.68 ppm and 1.90;1.15 ppm in the <sup>13</sup>C and <sup>1</sup>H dimension, respectively. With all other correlations assigned, the remaining <sup>3</sup>J<sub>CH</sub> correlation has to correspond to position 16. This carbon resides at 66.25 ppm and in the HSQC spectrum indeed corresponds to a CH-type of carbon, with the corresponding proton residing at 4.16 ppm. This last signal is indeed the last proton resonance showing a significant higher chemical shift than the majority residing in the aliphatic region between 2.2 and 0.5 ppm.

As a final confirmation for position 16 as the site of the new hydroxylation in the structure, all the correlations in the HMBC spectrum starting from the C16 signal are assigned and found to fit the expected local structure (Supplementary Methods Fig. 5b). In this respect, a <sup>3</sup>J<sub>CH</sub> correlation can be identified with CH18, CH<sub>2</sub> 22 and CH<sub>2</sub> 15, which in turn can be confirmed, because this latter CH<sub>2</sub> group also shows a clear <sup>3</sup>J<sub>CH</sub> correlation with CH<sub>3</sub> group 27. The fact that C15 can be identified at 36.32 ppm also confirms its hydroxylation at position 16 because, in a situation where this position does not carry an OH functionality, C15 is predicted to reside at a significantly lower chemical shift of 26.3 ppm as predicted by ChemDraw Professional 15.0.

In terms of stereochemistry, a relative positioning of the OH group can be deduced by means of through-space contacts in the ROESY spectrum (Supplementary Methods Fig. 5f). Starting from H16, three through-space contacts can be observed. These can be assigned to H21, H15 and CH<sub>3</sub> group 27. Given that CH<sub>3</sub> group 27 is oriented below the plane of the β-amyrin backbone, it is likely that this is also the case for H16, given the clear roe-cross peak. This means that in terms of stereochemistry, the OH group is sitting above the plane of the backbone and hence is in beta orientation. The other two through-space contacts, however, do not reveal significant information concerning the local stereochemistry of H16. To conclude, the assignment has been summarized in Supplementary Methods Table 2.

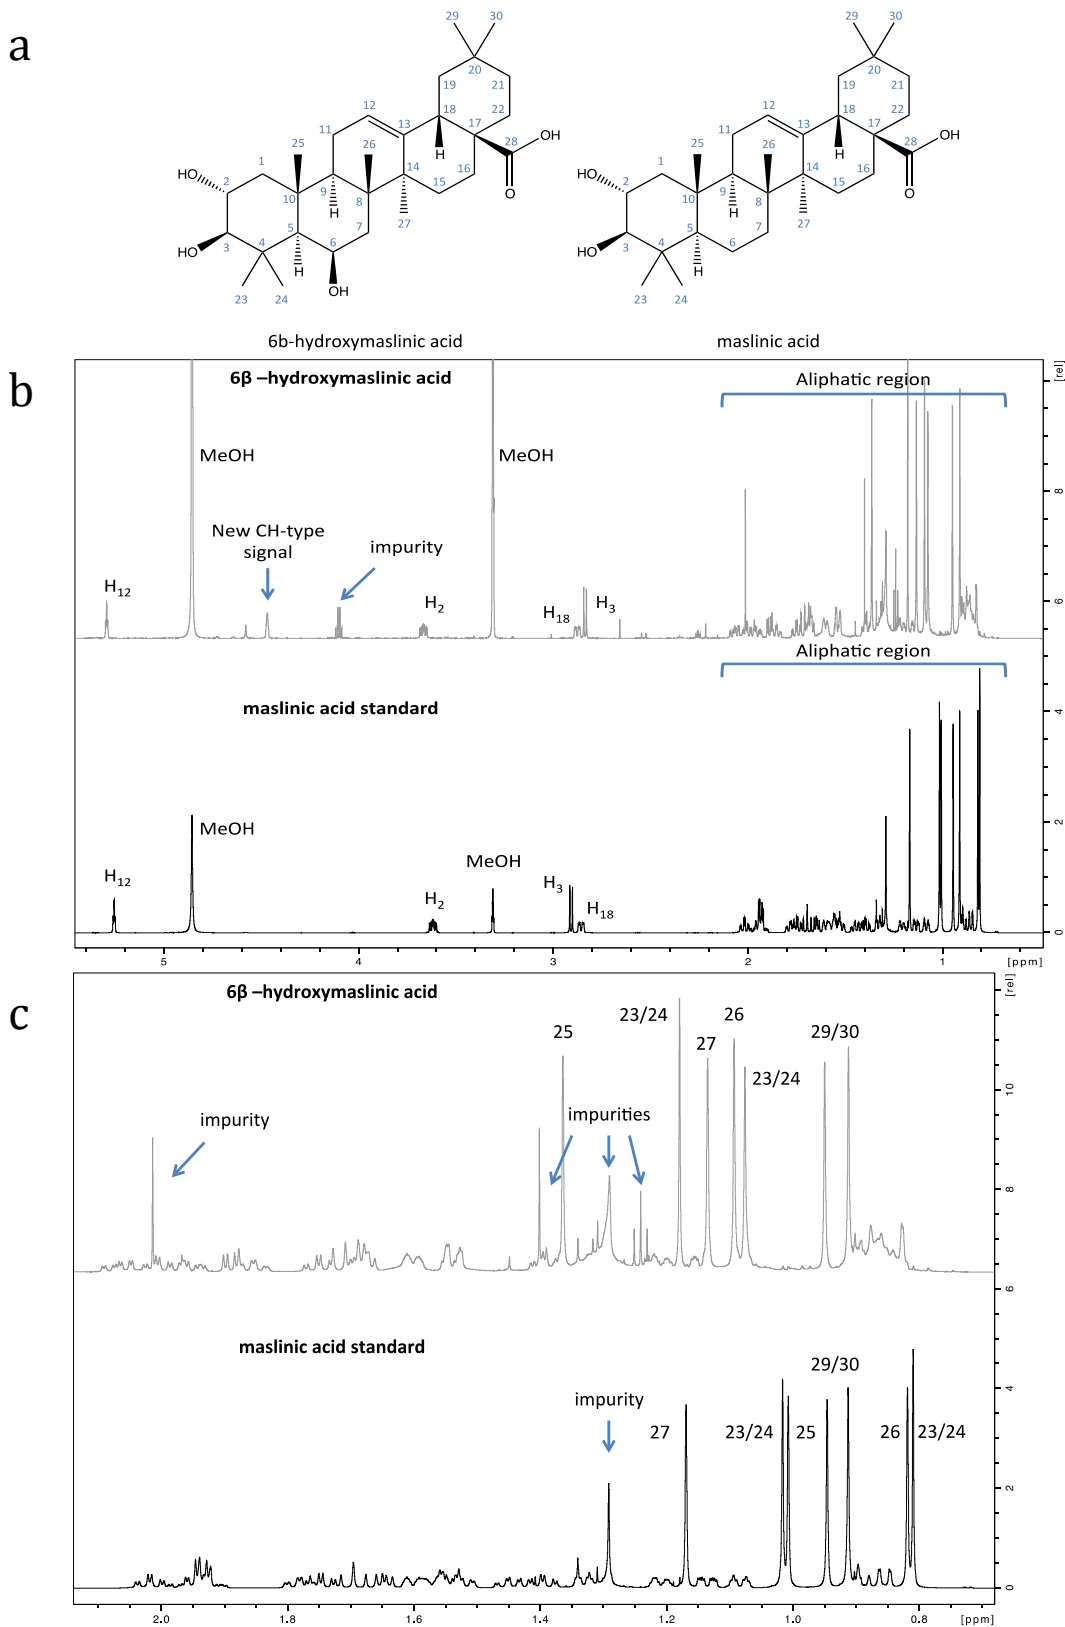

**Supplementary Methods Figure 1.**  $^1\text{H}$  NMR analysis of  $6\beta$ -hydroxy maslinic acid purified from yeast (a) Structure  $6\beta$ -hydroxy maslinic acid (left) and the commercial maslinic acid standard (right). (b) General overview of the two 1D  $^1\text{H}$  spectra of both  $6\beta$ -hydroxy maslinic (top) and the maslinic acid standard (bottom) where useful assignments have been indicated. (c) Zoom of the 1D  $^1\text{H}$  spectra in the aliphatic regions. The assignment of the different  $\text{CH}_3$  groups in the maslinic acid standard and plant metabolite has been indicated where necessary.

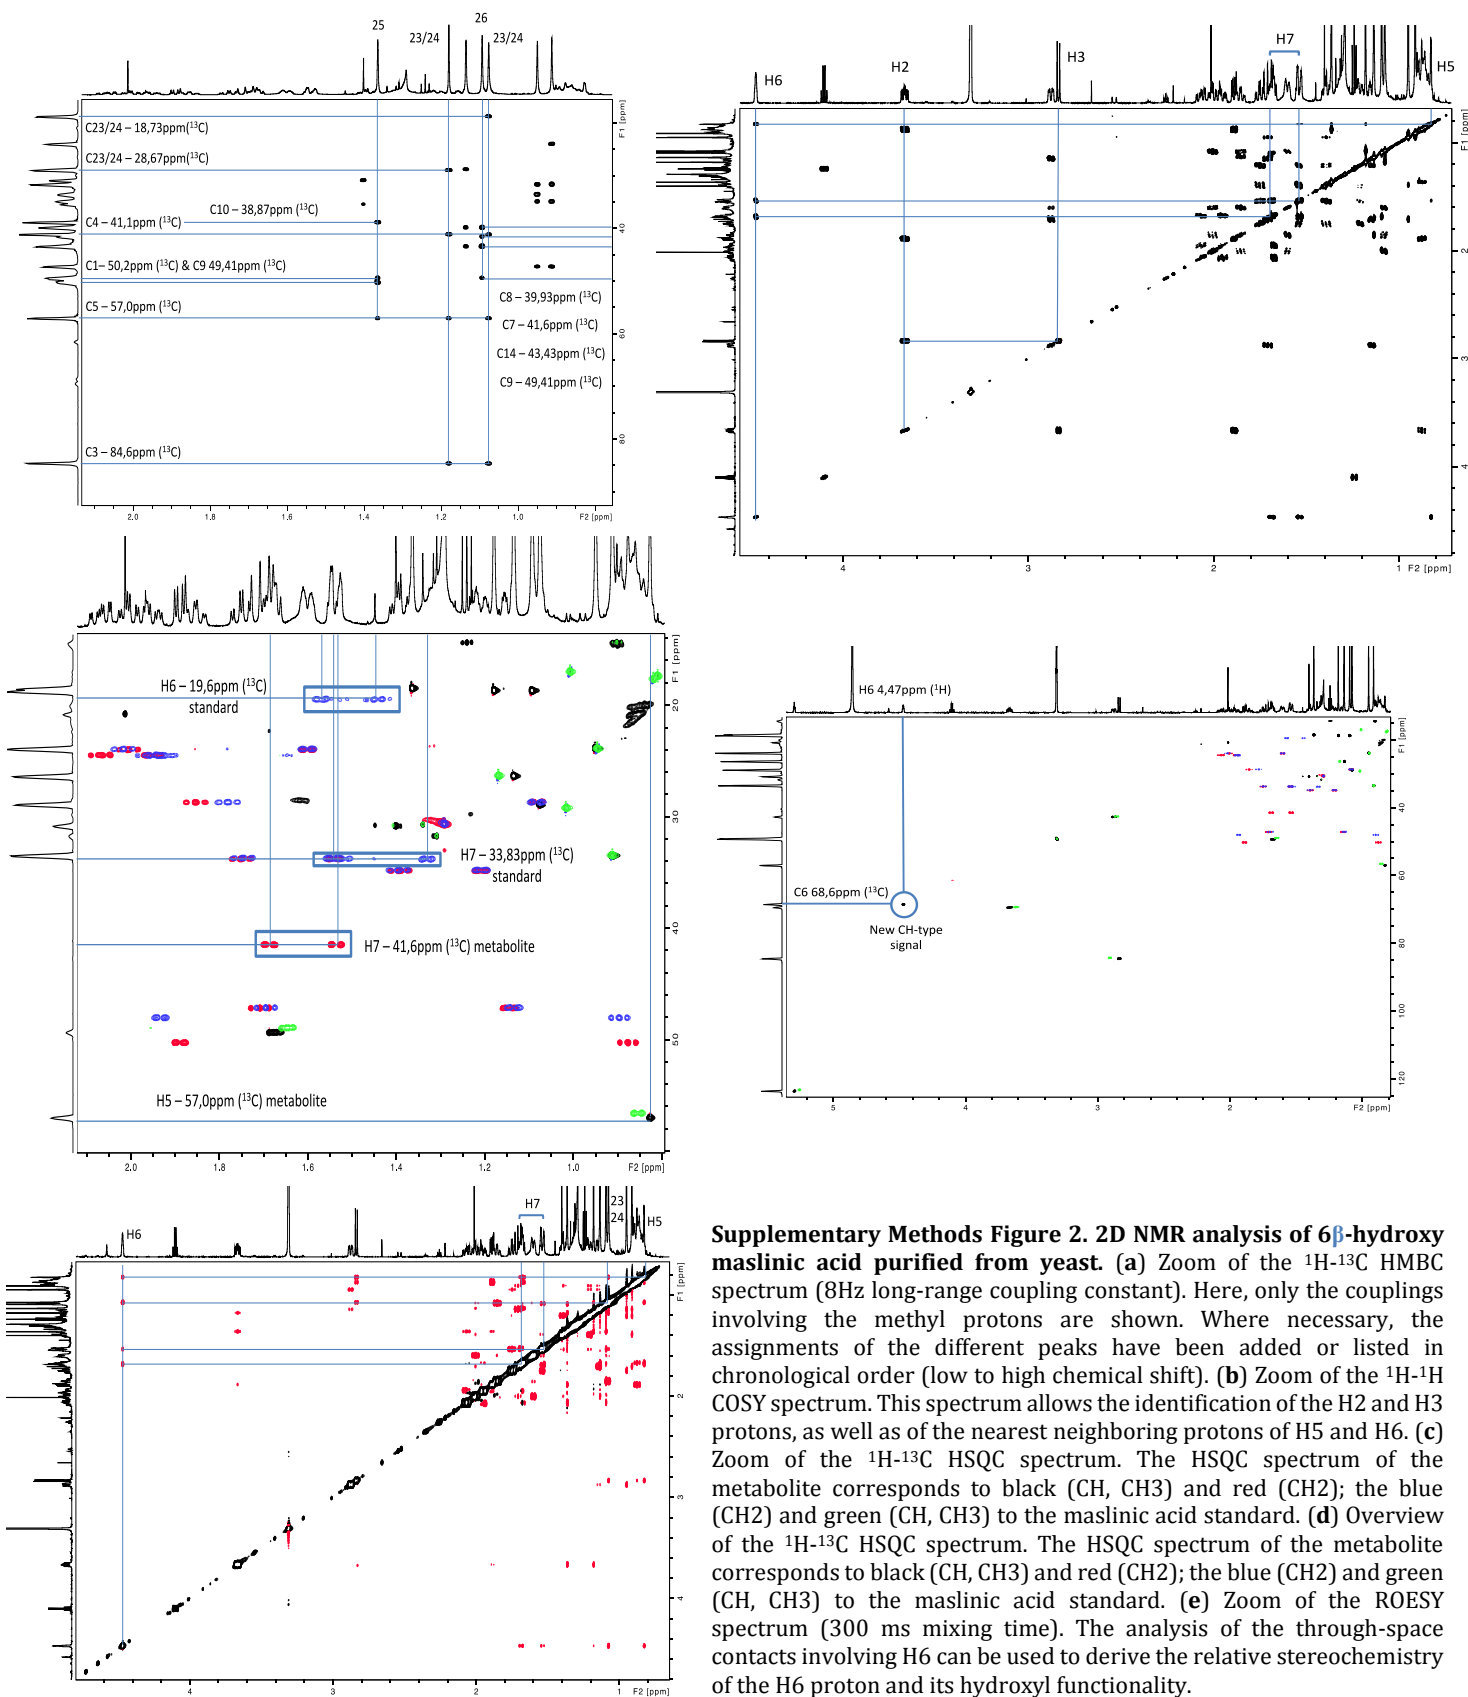

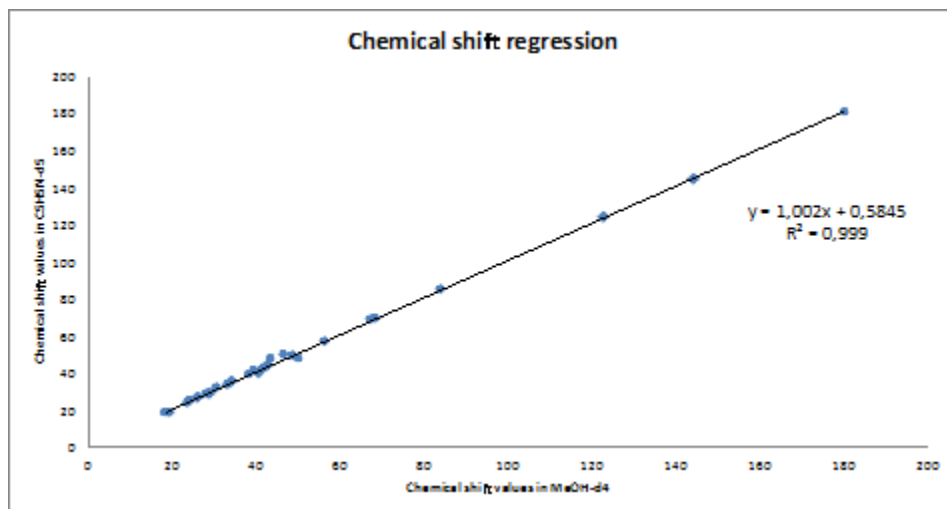

Supplementary Methods Figure 3. Regression of the two chemical shift values in C<sub>5</sub>H<sub>5</sub>N-d<sub>5</sub> and MeOH-d<sub>4</sub>.

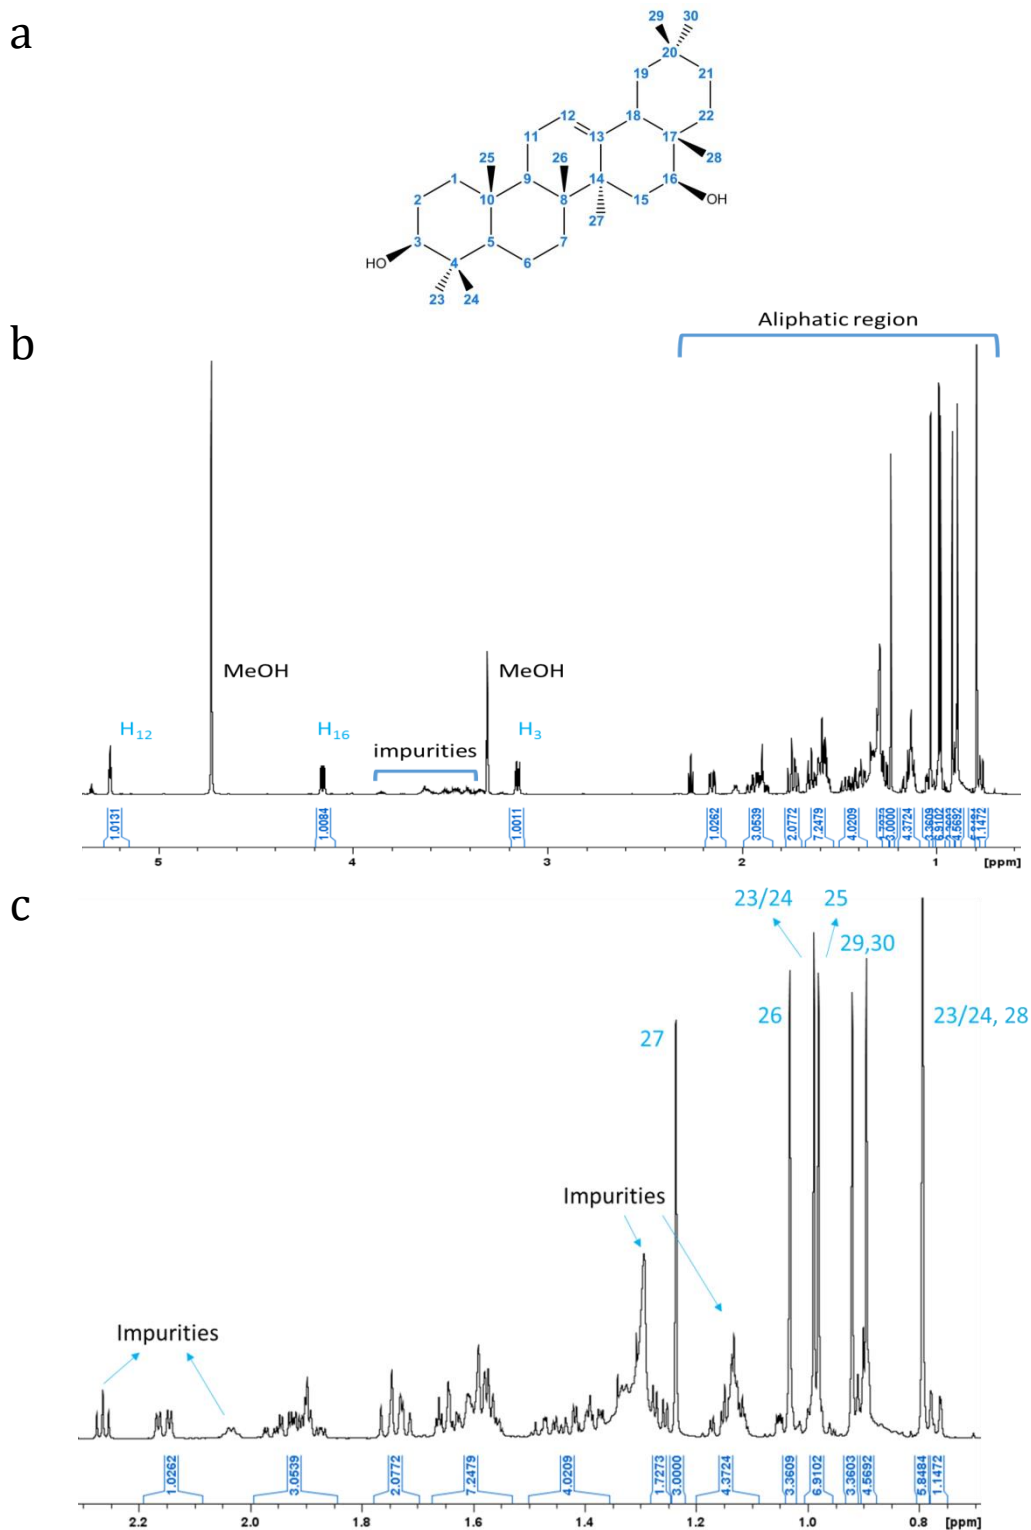

**Supplementary Methods Figure 4.** (a) Overview of the  $\beta$ -amyrin structure. The positions suspected of being hydroxylated are indicated by arrows. The numbering used in the assignment is indicated in blue. (b) General overview of the 1D  $^1\text{H}$  spectrum of 16 $\beta$ -hydroxy  $\beta$ -amyrin. Where necessary the assignments have been indicated. (c) Zoom of the 1D  $^1\text{H}$  aliphatic region of 16 $\beta$ -hydroxy  $\beta$ -amyrin. Where necessary the corresponding number of protons is indicated by the integral values and the different methyl signals are assigned as well. Some of the integrals correspond to more protons than expected; this is due to overlap with several minor impurities still present in the sample.

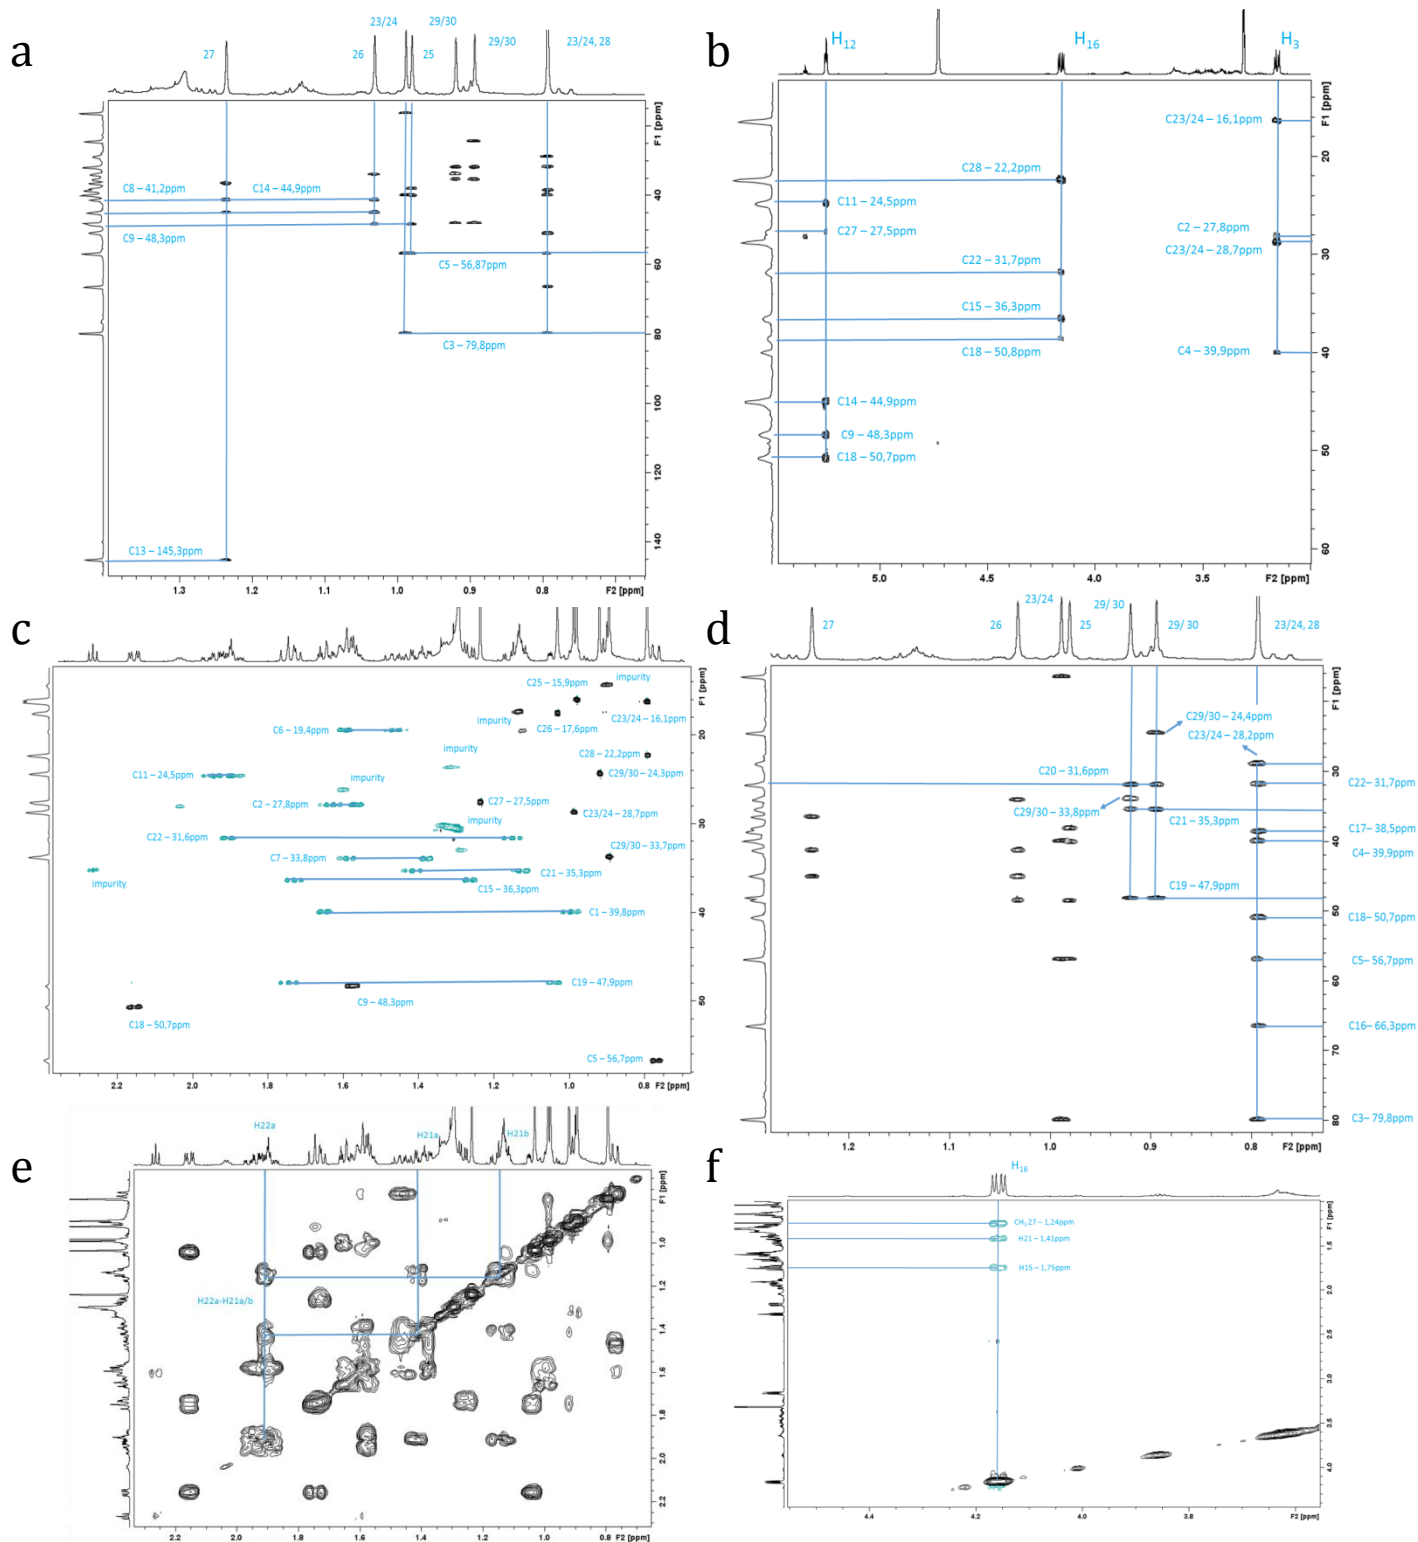

**Supplementary Methods Figure 5.** (a) Zoom on the  $^2\text{J}_{\text{CH}}$  and  $^3\text{J}_{\text{CH}}$  correlations involving the methyl resonances in the  $^1\text{H}$ - $^{13}\text{C}$  HMBC spectrum (8Hz). The correlations relevant for the sequential identification of the corresponding methyl signals have been indicated in blue with the corresponding chemical shift. (b) Zoom on the  $^2\text{J}_{\text{CH}}$  and  $^3\text{J}_{\text{CH}}$  correlations involving the alkene and CH-OH type protons in the  $^1\text{H}$ - $^{13}\text{C}$  HMBC spectrum (8Hz). The correlations relevant for the sequential identification of the corresponding methyl signals have been indicated in blue with the corresponding chemical shift. (c) Zoom on the  $^2\text{J}_{\text{CH}}$  and  $^3\text{J}_{\text{CH}}$  correlations involving the methyl resonances in the  $^1\text{H}$ - $^{13}\text{C}$  HMBC spectrum (8Hz). The correlations relevant for the sequential identification of the corresponding methyl signals have been indicated in blue with the corresponding chemical shift. (d) Zoom of the aliphatic region in the  $^1\text{H}$   $^{13}\text{C}$  HSQC spectra. The assignment of the corresponding carbons has been indicated in blue. (e) 2D COSY spectrum showing the nearest neighbor correlation between H22a and H21a/b. The correlation with H22b is not shown here, because it is almost in complete overlap with H21b. (f) 2D Off-resonance ROESY showing the through space correlations observed starting from H16. These contacts allow determining the relative stereochemistry of the CH unit in question (300 ms spinlock time).



| <sup>1</sup> H chemical shift values (ppm) |                                 |                      | <sup>13</sup> C chemical shift values (ppm) |                                                            |                                 |                      |
|--------------------------------------------|---------------------------------|----------------------|---------------------------------------------|------------------------------------------------------------|---------------------------------|----------------------|
| Position                                   | 6β-hydroxy maslinic acid (MeOD) | Maslinic acid (MeOD) | Position                                    | 6β-hydroxy maslinic acid (C <sub>5</sub> H <sub>5</sub> N) | 6β-hydroxy maslinic acid (MeOD) | Maslinic acid (MeOD) |
| 1                                          | 0.88;1.89                       | 0.89;1.93            | 1                                           | 46.5                                                       | 50.2                            | 48                   |
| 2                                          | 3.66                            | 3.62                 | 2                                           | 68.2                                                       | 69.6                            | 69.1                 |
| 3                                          | 2.84                            | 2.91                 | 3                                           | 83.9                                                       | 84.6                            | 84.2                 |
| 4                                          | quaternary carbon               | quaternary carbon    | 4                                           | 39.2                                                       | 41.1                            | 40.4                 |
| 5                                          | 0.83                            | 0,85                 | 5                                           | 56.4                                                       | 57                              | 56.7                 |
| 6                                          | 4.47                            | 1.45;1.57            | 6                                           | 67.4                                                       | 68.6                            | 19.4                 |
| 7                                          | 1.54;1.69                       | 1.33;1.52            | 7                                           | 41.1                                                       | 41.6                            | 33.72                |
| 8                                          | quaternary carbon               | quaternary carbon    | 8                                           | 40.6                                                       | 39.93                           | 40.52                |
| 9                                          | 1.68                            | 1.65                 | 9                                           | 48.6                                                       | 49.41                           | 49                   |
| 10                                         | quaternary carbon               | quaternary carbon    | 10                                          | 38.3                                                       | 38.87                           | 39.2                 |
| 11                                         | 1.95;2.07                       | 1.95;2.07            | 11                                          | 23.9                                                       | 24.52                           | 24.48                |
| 12                                         | 5.29                            | 5.26                 | 12                                          | 122.7                                                      | 123.8                           | 123                  |
| 13                                         | quaternary carbon               | quaternary carbon    | 13                                          | 144                                                        | 144.66                          | 145                  |
| 14                                         | quaternary carbon               | quaternary carbon    | 14                                          | 42.6                                                       | 43.43                           | 42.86                |
| 15                                         | 1.08;1.85                       | 1.08;1.78            | 15                                          | 28.1                                                       | 28.67                           | 28.7                 |
| 16                                         | 1.60;2.01                       | 1.60;2.02            | 16                                          | 23.6                                                       | 23.94                           | 24                   |
| 17                                         | quaternary carbon               | quaternary carbon    | 17                                          | 43.3                                                       | 47.6                            | 47.4                 |
| 18                                         | 2.88                            | 2.86                 | 18                                          | 41.9                                                       | 42.72                           | 42.5                 |
| 19                                         | 1.15;1.71                       | 1.14;1.70            | 19                                          | 49.9                                                       | 47.16                           | 47.1                 |
| 20                                         | quaternary carbon               | quaternary carbon    | 20                                          | 30.8                                                       | 31.65                           | 31.6                 |
| 21                                         | 1.21;1.39                       | 1.21;1.40            | 21                                          | 34.1                                                       | 34.88                           | 34.7                 |
| 22                                         | 1.54;1.75                       | 1.54;1.75            | 22                                          | 33.1                                                       | 33.76                           | 33.6                 |
| 23                                         | 1.08                            | 0.81                 | 23                                          | 29                                                         | 28.97                           | 29.17                |
| 24                                         | 1.18                            | 1.02                 | 24                                          | 19.1                                                       | 18.73                           | 17.4                 |
| 25                                         | 1.36                            | 1.01                 | 25                                          | 18.4                                                       | 18.43                           | 16.98                |
| 26                                         | 1.09                            | 0.82                 | 26                                          | 18.3                                                       | 18.73                           | 17.9                 |
| 27                                         | 1.14                            | 1.17                 | 27                                          | 26.2                                                       | 26.32                           | 26.38                |
| 28                                         | quaternary carbon               | quaternary carbon    | 28                                          | 180                                                        | 180.3                           | 181.6                |
| 29                                         | 0.95                            | 0.95                 | 29                                          | 33.2                                                       | 33.5                            | 33.45                |
| 30                                         | 0.91                            | 0.92                 | 30                                          | 23.6                                                       | 23.85                           | 23.88                |

**Supplementary Methods Table 1.** Overview of the <sup>1</sup>H and <sup>13</sup>C chemical shifts of the plant metabolite and maslinic acid in MeOH-d<sub>4</sub> (298K, 700MHz) and the <sup>13</sup>C literature chemical shift values of 6β-hydroxy maslinic acid in C<sub>5</sub>H<sub>5</sub>N-d<sub>5</sub> (300MHz). The chemical shift values of the methyl groups 23/24 and 29/30 pairs are interchangeable, because there is no distinction possible between these positions.

| <sup>1</sup> H assignment |           |              |                | <sup>13</sup> C assignment |           |                |
|---------------------------|-----------|--------------|----------------|----------------------------|-----------|----------------|
| Chemical shift (ppm)      | Integral  | Multiplicity | Interpretation | Chemical shift (ppm)       | Type      | Interpretation |
| 0.77                      | 1         | dd           | H5             | 15.93                      | CH3       | C25            |
| 0.79                      | 6         | s            | 23/24, 28      | 16.1                       | CH3       | C23/24         |
| 89                        | 3         | s            | 29/30          | 17.46                      | CH3       | C26            |
| 392                       | 3         | s            | 29/30          | 19.39                      | CH2       | C6             |
| 0.98                      | 3         | s            | 25             | 31.58                      | Cq        | C20            |
| 0.99                      | 3         | s            | 23/24          | 22.2                       | CH3       | C28            |
| 1                         | 1         | -            | H1a            | 24.32                      | CH3       | C29/30         |
| 1.03                      | 3         | s            | 26             | 24.47                      | CH2       | C11            |
| 1.04                      | 1         | -            | H19a           | 27.53                      | CH3       | C27            |
| 1.12                      | 1         | -            | H21a           | 27.84                      | CH2       | C2             |
| 1.24                      | 3         | s            | 27             | 28.66                      | CH3       | C23/24         |
| 1.15                      | 1         | -            | H22a           | 31.58                      | CH2       | C22            |
| 1.27                      | 1         | dd           | H15a           | 33.68                      | CH3       | C29/30         |
| 1.38                      | 1         | -            | H7a            | 33.79                      | CH2       | C7             |
| 1.42                      | 1         | -            | H21b           | 35.27                      | CH2       | C21            |
| 1.46                      | 1         | -            | H6a            | 36.32                      | CH2       | C15            |
| 1.57                      | 1         | -            | H2a            | 38.55                      | Cq        | C17            |
| 1.58                      | 1         | -            | H9             | 38.09                      | Cq        | C10            |
| 1.59                      | 1         | -            | H7b            | 39.83                      | CH2       | C1             |
| 1.59                      | 1         | -            | H6b            | 39.91                      | Cq        | C4             |
| 1.63                      | 1         | -            | H2b            | 41.2                       | Cq        | C8             |
| 1.65                      | 1         | -            | H1b            | 44.88                      | Cq        | C14            |
| 1.73                      | 1         | -            | H15b           | 47.85                      | CH2       | C19            |
| 1.75                      | 1         | t            | H19b           | 48.3                       | CH        | C9             |
| 1.89                      | 1         | -            | H11a           | 50.65                      | CH        | C18            |
| 1.91                      | 1         | -            | H22b           | 56.7                       | CH        | C5             |
| 1.94                      | 1         | -            | H11b           | 66.3                       | CH        | C16            |
| 2.15                      | 1         | dd           | H18            | 79.7                       | CH        | C3             |
| 3.16                      | 1         | dd           | H3             | 123.3                      | CH        | C12            |
| 3.31                      | -         | -            | MeOH (solvent) | 145.3                      | Cq        | C13            |
| 4.16                      | 1         | dd           | H16            |                            |           |                |
| 4.73                      | -         | -            | MeOH (solvent) |                            |           |                |
| 5.25                      | 1         | t            | H12            |                            |           |                |
| <b>Total</b>              | <b>48</b> |              |                |                            | <b>30</b> |                |

**Supplementary Methods Table 2.** Overview of the <sup>13</sup>C signals and their corresponding assignment, in correspondence with the numbering used in Fig. 1A.

## Supplementary References

1. Geisler, K. *et al.* Biochemical analysis of a multifunctional cytochrome P450 (CYP51) enzyme required for synthesis of antimicrobial triterpenes in plants. *Proc. Natl. Acad. Sci. USA* **110**, E3360-E3367 (2013).
2. Castillo, D. A., Kolesnikova, M. D. & Matsuda, S. P. T. An effective strategy for exploring unknown metabolic pathways by genome mining. *J. Am. Chem. Soc.* **135**, 5885-5894 (2013).
3. Field, B. & Osbourn, A. E. Metabolic diversification— independent assembly of operon-like gene clusters in different plants. *Science* **320**, 543-547 (2008).
4. Boutanaev, A. M. *et al.* Investigation of terpene diversification across multiple sequenced plant genomes. *Proc. Natl. Acad. Sci. USA* **112**, E81-E88 (2015).
5. Yasumoto, S., Fukushima, E. O., Seki, H. & Muranaka, T. Novel triterpene oxidizing activity of *Arabidopsis thaliana* CYP716A subfamily enzymes. *FEBS Lett.* **590**, 533-540 (2016).
6. Carelli, M. *et al.* *Medicago truncatula* CYP716A12 is a multifunctional oxidase involved in the biosynthesis of hemolytic saponins. *Plant Cell* **23**, 3070-3081 (2011).
7. Fukushima, E. O. *et al.* CYP716A subfamily members are multifunctional oxidases in triterpenoid biosynthesis. *Plant Cell Physiol.* **52**, 2050-2061 (2011).
8. Moses, T. *et al.* OSC2 and CYP716A14v2 catalyze the biosynthesis of triterpenoids for the cuticle of aerial organs of *Artemisia annua*. *Plant Cell* **27**, 286-301 (2015).
9. Han, J.-Y., Kim, H.-J., Kwon, Y.-S. & Choi, Y.-E. The Cyt P450 enzyme CYP716A47 catalyzes the formation of protopanaxadiol from dammarenediol-II during ginsenoside biosynthesis in *Panax ginseng*. *Plant Cell Physiol.* **52**, 2062-2073 (2011).
10. Han, J.-Y., Kim, M.-J., Ban, Y.-W., Hwang, H.-S. & Choi, Y.-E. The involvement of  $\beta$ -amyrin 28-oxidase (CYP716A52v2) in oleanane-type ginsenoside biosynthesis in *Panax ginseng*. *Plant Cell Physiol.* **54**, 2034-2046 (2013).
11. Han, J.-Y., Hwang, H.-S., Choi, S.-W., Kim, H.-J. & Choi, Y.-E. Cytochrome P450 CYP716A53v2 catalyzes the formation of protopanaxatriol from protopanaxadiol during ginsenoside biosynthesis in *Panax ginseng*. *Plant Cell Physiol.* **53**, 1535-1545 (2012).
12. Moses, T. *et al.* Unraveling the triterpenoid saponin biosynthesis of the African shrub *Maesa lanceolata*. *Mol. Plant* **8**, 122-135 (2015).
13. Khakimov, B. *et al.* Identification and genome organization of saponin pathway genes from a wild crucifer, and their use for transient production of saponins in *Nicotiana benthamiana*. *Plant J.* **84**, 478-490 (2015).
14. Huang, L. *et al.* Molecular characterization of the pentacyclic triterpenoid biosynthetic pathway in *Catharanthus roseus*. *Planta* **236**, 1571-1581 (2012).
15. Moses, T. *et al.* Combinatorial biosynthesis of sapogenins and saponins in *Saccharomyces cerevisiae* using a C-16 $\alpha$  hydroxylase from *Bupleurum falcatum*. *Proc. Natl. Acad. Sci. USA* **111**, 1634-1639 (2014).
16. Field, B. *et al.* Formation of plant metabolic gene clusters within dynamic chromosomal regions. *Proc. Natl. Acad. Sci. USA* **108**, 16116-16121 (2011).
17. Krokida, A. *et al.* A metabolic gene cluster in *Lotus japonicus* discloses novel enzyme functions and products in triterpene biosynthesis. *New Phytol.* **200**, 675-690 (2013).
18. Seki, H. *et al.* Triterpene functional genomics in licorice for identification of CYP72A154 involved in the biosynthesis of glycyrrhizin. *Plant Cell* **23**, 4112-4123 (2011).
19. Fukushima, E. O. *et al.* Combinatorial biosynthesis of legume natural and rare triterpenoids in engineered yeast. *Plant Cell Physiol.* **54**, 740-749 (2013).
20. Biazzi, E. *et al.* CYP72A67 catalyzes a key oxidative step in *Medicago truncatula* hemolytic saponin biosynthesis. *Mol. Plant* **8**, 1493-1506 (2015).

21. Shang, Y. *et al.* Biosynthesis, regulation, and domestication of bitterness in cucumber. *Science* **346**, 1084-1088 (2014).
22. Zhang, J. *et al.* Oxidation of cucurbitadienol catalyzed by CYP87D18 in the biosynthesis of mogrosides from *Siraitia grosvenorii*. *Plant Cell Physiol.*, in press(10.1093/pcp/pcw038).
23. Seki, H. *et al.* Licorice  $\beta$ -amyrin 11-oxidase, a cytochrome P450 with a key role in the biosynthesis of the triterpene sweetener glycyrrhizin. *Proc. Natl. Acad. Sci. USA* **105**, 14204-14209 (2008).
24. Augustin, M. M. *et al.* Elucidating steroid alkaloid biosynthesis in *Veratrum californicum*: production of verazine in Sf9 cells. *Plant J.* **82**, 991-1003 (2015).
25. Shibuya, M. *et al.* Identification of  $\beta$ -amyrin and sophoradiol 24-hydroxylase by expressed sequence tag mining and functional expression assay. *FEBS J.* **273**, 948-959 (2006).
26. Moses, T., Thevelein, J. M., Goossens, A. & Pollier, J. Comparative analysis of CYP93E proteins for improved microbial synthesis of plant triterpenoids. *Phytochemistry* **108**, 47-56 (2014).
27. Zucaro, Z. Y. L., Compagnone, R. S., Hess, S. C. & Delle Monache, F. 6  $\beta$ -hydroxymaslinic acid, a triterpene from *Vochysia ferruginea*. *J. Braz. Chem. Soc.* **11**, 241-244 (2000).
